# Supplementary material for: Capturing the Resistome: a Targeted Capture Method To Reveal Antibiotic Resistance Determinants in Metagenomes
Source: PubMed Central journal article supplement (PMC7187591; doi:10.1128/aac.01324-19), 2019-12-20
Supplement: AAC.01324-19-s0001.pdf [file AAC.01324-19-s0001.pdf]

|                                                                                                                                      |    |
|--------------------------------------------------------------------------------------------------------------------------------------|----|
| Supplementary methods:.....                                                                                                          | 2  |
| Supplementary Figure 1: Probe and CARD nucleotide sequence statistics .....                                                          | 5  |
| Supplementary Table 1: Bacterial strains used in control experiments.....                                                            | 6  |
| Supplementary Table 2: Library and sequencing information. ....                                                                      | 7  |
| Supplementary Table 3: Individual strain enrichment results. ....                                                                    | 9  |
| Supplementary Figure 2: Consistency in library prep methods and trials.....                                                          | 10 |
| Supplementary Table 4: Pooling of genomic DNA to create “mock metagenomes”.....                                                      | 11 |
| Supplementary Table 5: Enrichment results to probe-targeted regions in pooled samples.....                                           | 13 |
| Supplementary Figure 3: Sensitivity in recovery of bait-targeted regions with reads.....                                             | 16 |
| Supplementary Figure 4: Enrichment results in higher read counts on antibiotic resistance genes compared to shotgun sequencing ..... | 17 |
| Supplementary Table 6: Control enrichment with <i>Escherichia coli</i> C0002.....                                                    | 18 |
| Supplementary Figure 5: Genes identified in positive control enrichments.....                                                        | 19 |
| Supplementary Table 7: Phase 2 enrichment results with the full number of reads.....                                                 | 20 |
| Supplementary Figure 6: Comparing enriched and shotgun ARG recovery. ....                                                            | 21 |
| Supplementary Table 8: Phase 2 enrichment results with subsampled reads.....                                                         | 21 |
| Supplementary Table 9: Phase 2 overlapping genes with the full number of reads.....                                                  | 22 |
| Supplementary Table 10: Phase 2 overlapping genes with subsampled reads. ....                                                        | 22 |
| Supplementary Figure 7: Hierarchical clustering of enriched libraries .....                                                          | 24 |
| Supplementary Figure 8: Hierarchical clustering of enriched and shotgun libraries.....                                               | 25 |
| Supplementary Figure 9: Rarefaction curves for identification of antibiotic resistance genes. 26                                     |    |
| Supplementary Table 11: Sequencing reads identified in the Blank samples. ....                                                       | 27 |
| Supplementary Table 12: Negative control enrichment with Blank samples.....                                                          | 29 |
| Supplementary Table 13: Genes identified through metagenomic analysis of enriched and shotgun samples.....                           | 29 |

## **Supplementary methods: Modified Library Preparation for Trial 2**

The same genomic DNA (except for *Pseudomonas aeruginosa* C00060) used in Trial 1 was used for library construction through a modified library preparation protocol (1). Briefly, ~200 nanograms of sonicated genomic DNA (250 - 300 bp) was used for library preparation at a volume of 25  $\mu$ L. Deviations from the protocol include the use of KAPA Pure Beads (KK8000, Roche Canada, Laval, QC) instead of AMPure beads, oligonucleotides ordered from Integrated DNA Technologies (IDT, Coralville, IA, USA) (the ready-to-use adapter mix was diluted to 10 $\mu$ M of each adapter prior to use), and a total reaction volume of 50  $\mu$ L for blunt end repair. Briefly, blunt end repair with T4 polynucleotide kinase (10U/ $\mu$ L) and T4 DNA polymerase (5U/ $\mu$ L) was carried out for 15 min at 25°C and 15 min at 12°C in a modified buffer (50mM NaCl, 10mM Tris-HCl, 10 mM MgCl<sub>2</sub>, 100  $\mu$ g/ml BSA, pH 7.9 at 25C) with 1 mM DTT, 100  $\mu$ M dNTPs (2.5 mM each), and 1 mM ATP. Adapter ligation was performed using a final adapter concentration of 2.5 $\mu$ M, with T4 DNA ligase (0.125U/ $\mu$ L) in T4 DNA ligase buffer (1X) and PEG-4000 (5%) for 15 hours at 16°C, then held at 4°C. The reaction was purified using KAPA Pure beads at 1.8X and eluted in 20  $\mu$ L of EBT (10 mM Tris-Cl, pH 8.3, 0.05% Tween-20). This was followed with adapter fill-in with Bst polymerase, large fragment (8U/ $\mu$ L) in ThermoPol reaction buffer (10X) with dNTPs (final concentration of 250  $\mu$ M each) (30 mins at 37°C; 80°C for 20 mins; hold at 4°C). Purification with library size-selection was performed using KAPA Purebeads (0.6X-0.8X ratio of beads to reaction volume) and products were eluted in 30  $\mu$ L of 10mM Tris-HCl, pH 8.3. Indexing PCR was performed using 12.5  $\mu$ L of template, KAPA HiFi Hotstart DNA polymerase ready mix (2X), (750nM of each indexing primer – 8 bp primers ordered from IDT diluted in nuclease free water at a stock concentration of 100 $\mu$ M ) in a 40  $\mu$ L reaction with the following conditions: 1) 98°C for 45 sec; 2) 98°C for 15 sec; 3) 60°C for 45 sec; 4) 72°C for 30 sec; 5) Repeat

2-4 for 12 cycles total; 6) 72°C for 1 min. Libraries were purified with 1.5X KAPA Pure beads then eluted in 33 µL 10 mM Tris pH 8.0. Re-amplification of libraries for 2 cycles was performed using 1 µL of each library sample and KAPA HiFi Hotstart DNA polymerase ready mix (2X) and Library Amplification Primer Mix (10X) supplied by KAPA in the Library Amplification Kit with the followed conditions: 1) 98°C for 45 sec; 2) 98°C for 15 sec; 3) 60°C for 45 sec; 4) 72°C for 30 sec; 5) Repeat 2 - 4 for 2 cycles total; 6) 72°C for 1 min. Libraries were purified using 1.5X Kapa Purebeads and eluted in 33 µL of 10 mM Tris-HCl pH 8.3. A negative control was also included consisting of a blank DNA extraction carried throughout the DNA extraction of bacterial DNA. Bioanalyzer and qPCR analyses were performed through the McMaster Farncombe Metagenomics Facility on all libraries including the blanks.

### **Enrichment methods**

For Phase 1 Trial 1, the hybridization mix and blockers mix were prepared as described in the myBaits<sup>®</sup> manual version 3 (Arbor Biosciences, Ann Arbor, MI). 7 µL of DNA library (~100 ng) was added to the blockers mix and libraries were denatured at 95°C for 5 minutes. The hybridization mix and libraries with blockers were brought to the hybridization temperature of 65°C for 5 minutes. Hybridization mixes including the appropriate concentration of probeset were mixed with libraries and incubated at 65°C for 16 hours. After 16 hours, the wash buffer was prepared and heated to 65°C. Dynabeads MyOne Streptavidin C1 beads were prepared with binding buffer (10 mM Tris-HCl pH7.5, 1 mM EDTA, 2M NaCl in nuclease-free water) by three washes with binding buffer, and finally resuspended in binding buffer then heated to 65°C (Thermo Fisher, Waltham, MA). Prepared beads were added to capture reactions, incubated at 65°C for 30 minutes with frequent mixing, then pelleted on a magnetic rack. Beads were washed with pre-heated wash buffer (Supplied in the myBaits<sup>®</sup> kit), incubated for 10 minutes at 65°C and the wash

was repeated two times. The beads were finally resuspended in 30  $\mu$ L 10mM Tris-Cl, 0.05% Tween-20, pH 8.3. Post-capture amplification was performed on 15  $\mu$ L of the bead-bound library with for 30 cycles of amplification using KAPA HiFi Hotstart DNA polymerase ready mix (2X), Library Amplification Primer Mix (10X) with the followed conditions: 1) 98°C for 45 sec; 2) 98°C for 15 sec; 3) 60°C for 45 sec; 4) 72°C for 30 sec; 5) Repeat 2-4 for 30 cycles total; 6) 72°C for 1 min. Reactions were purified with KAPA Purebeads (0.8X cleanup) and eluted in 30  $\mu$ L of 10 mM Tris-HCl, pH 8.3. These reaction products were purified with KAPA pure beads (1X) and eluted in 30  $\mu$ L 10 mM Tris-HCl, pH 8.3. This is an over-amplified product and likely contains heterodimers of library fragments. An aliquot (2  $\mu$ L) was used for an additional 3 cycles of amplification with the same primers and conditions as above. A 1X KAPA Purebeads purification was performed and products were eluted in 30  $\mu$ L TE buffer. The concentration was verified by absorbance, followed by the Bioanalyzer and qPCR through the McMaster Metagenomics Facility. For Trial 2, conditions were similar to the enrichment for Trial 1 libraries except for post-enrichment which was performed using 7.5  $\mu$ L of enriched library, 12.5  $\mu$ L of KAPA Ready Mix 2X, 1  $\mu$ L of 10X primer mix (1) 98°C 45 sec; 2) 98°C 30sec; 3) 60°C for 45sec; 4) 72°C for 45sec; 5) Repeat step 2 - 4 for 17 cycles; 6) 72°C for 5 min; 7) 4°C hold. PCR products were purified using KAPA Pure beads (1.5X) and eluted in 10 mM Tris-HCl pH 8.0. The concentration was determined via absorbance and additional library quality control was performed through the McMaster Metagenomics Facility (Bioanalyzer and qPCR). Products were sequenced via Illumina MiSeq 2 x 250 bp.

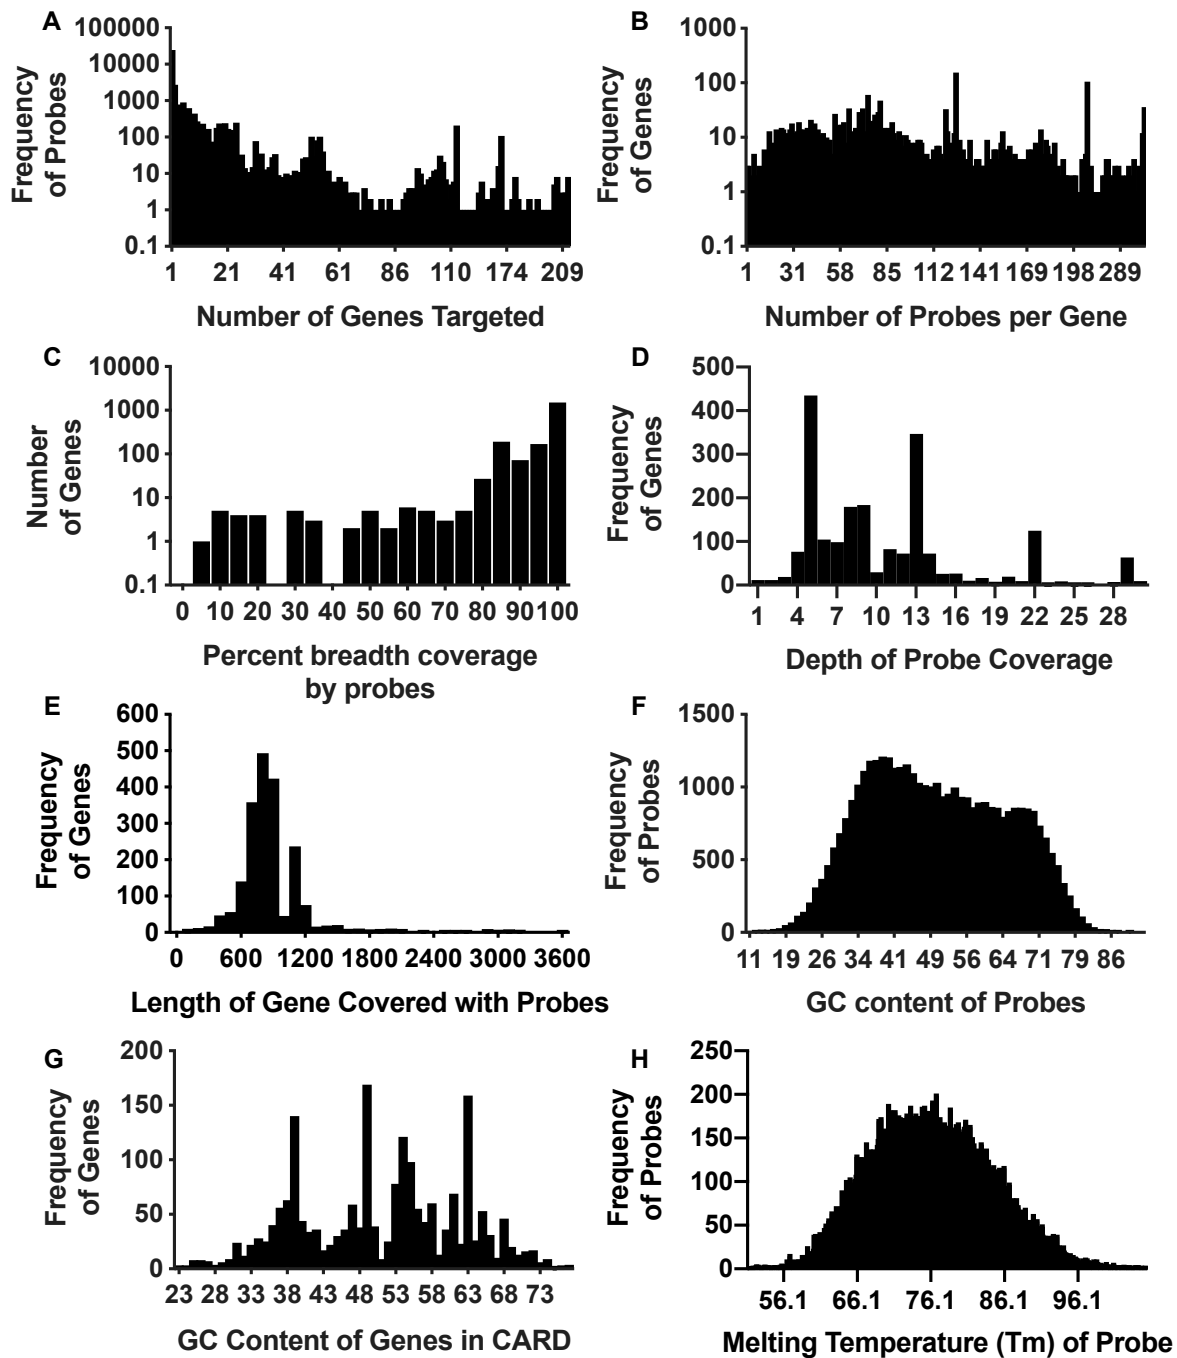

**Supplementary Figure 1: Probe and CARD nucleotide sequence statistics**

A) Number of genes targeted by probes through mapping with Bowtie2. B) Number of probes targeting genes through mapping with Bowtie2. C) Percent length coverage of genes with probes. D) Mean depth of probe coverage across individual genes in CARD. E) Length of sequence targeted by probes in genes in CARD. F) GC content of probes. G) GC content of genes in CARD. H) Melt temperature of final list of probes. Figures generated using Prism 8 for macOS.

Supplementary Table 1: Bacterial strains used in control experiments.

Clinical bacterial isolates obtained through the Wright Clinical Collection. Bacterial genomes were sequenced, and draft genome assemblies were analyzed through the Resistance Gene Identifier in CARD to predict the number of resistance genes. The total probeset was mapped against the draft assembled genome and the number of genes with probe coverage, percentage of genome covered by probes and overlap between predicted RGI genes and probe coverage were determined.

| Bacterial strain                    | Genome size (Mb) | GC Content (%) | Predicted genes by RGI | Region predicted by RGI (%) | # Probe-targeted sites | Length of probe-targeted site (average and range) | Region with probe coverage (%) | RGI genes with probes | Region predicted by RGI and targeted by probes (%) |
|-------------------------------------|------------------|----------------|------------------------|-----------------------------|------------------------|---------------------------------------------------|--------------------------------|-----------------------|----------------------------------------------------|
| <i>Escherichia coli</i> C0002       | 5.29             | 50.62          | 67                     | 1.64                        | 65                     | 797.75<br>(80 - 3595)                             | 0.97                           | 43                    | 0.81                                               |
| <i>Klebsiella pneumoniae</i> C0006  | 5.45             | 57.23          | 30                     | 0.55                        | 35                     | 331.54<br>(80 - 877)                              | 0.21                           | 17                    | 0.17                                               |
| <i>Staphylococcus aureus</i> C0018  | 2.92             | 32.66          | 16                     | 0.55                        | 13                     | 1127.54<br>(140 – 2013)                           | 0.50                           | 12                    | 0.41                                               |
| <i>Staphylococcus aureus</i> C0033  | 2.92             | 32.77          | 16                     | 0.64                        | 14                     | 1143.07<br>(155 – 2130)                           | 0.52                           | 13                    | 0.44                                               |
| <i>Klebsiella pneumoniae</i> C0050  | 5.60             | 57.05          | 34                     | 0.63                        | 40                     | 346.18<br>(80 – 900)                              | 0.25                           | 18                    | 0.19                                               |
| <i>Pseudomonas aeruginosa</i> C0060 | 6.80             | 66.19          | 53                     | 1.18                        | 48                     | 933.35<br>(97 – 3415)                             | 0.66                           | 33                    | 0.54                                               |
| <i>Escherichia coli</i> C0094       | 5.22             | 50.74          | 67                     | 1.65                        | 64                     | 779.86<br>(80 – 3003)                             | 0.95                           | 41                    | 0.79                                               |
| <i>Pseudomonas aeruginosa</i> C0292 | 6.81             | 66.21          | 54                     | 1.17                        | 48                     | 938.71<br>(97 – 3415)                             | 0.66                           | 33                    | 0.57                                               |

**Supplementary Table 2: Library and sequencing information.**

The amount in nanograms of each library and the corresponding amount of probes used for enrichment. The average size of library fragments prior to enrichment was determined through the Agilent Bioanalyzer 2100. The number of clusters (paired-end reads) that were generated for each library when sequenced by Illumina's MiSeq V2 2x250. Blanks for each trial were included and sequenced on a separate run; many of the blank libraries did not generate peaks on the Bioanalyzer nor any signal by quantitative PCR therefore their values are N/A. In Phase 2, three positive controls for enrichment were included with genomic DNA from *Escherichia coli* C0002 and varying library and probe amounts.

| Phase   | Trial/Set                | Library                  | Amount of Probes (ng)    | Amount of Library (ng) | Average Library Size (bp) | Clusters sequenced enriched | Clusters sequenced shotgun |
|---------|--------------------------|--------------------------|--------------------------|------------------------|---------------------------|-----------------------------|----------------------------|
| Phase 1 | Trial 1                  | C0002                    | 100                      | 100                    | 988                       | 66926                       |                            |
|         |                          | C0018                    | 100                      | 100                    | 994                       | 75860                       |                            |
|         |                          | C0050                    | 100                      | 100                    | 1222                      | 73941                       |                            |
|         |                          | C0060                    | 100                      | 100                    | 1225                      | 81810                       |                            |
|         |                          | Pool 1                   | 100                      | 100                    | 1257                      | 61568                       | 218008                     |
|         |                          | Pool 2                   | 100                      | 100                    | 1158                      | 61658                       | 159059                     |
|         |                          | Pool 3                   | 100                      | 100                    | 1216                      | 58308                       | 109194                     |
|         |                          | Negative Control - Blank | 100                      | N/A                    | 632                       | 170565                      |                            |
|         | Trial 2                  | C0002                    | 100                      | 100                    | 435                       | 99748                       |                            |
|         |                          | C0018                    | 100                      | 100                    | 438                       | 143804                      |                            |
|         |                          | C0050                    | 100                      | 100                    | 416                       | 153673                      |                            |
|         |                          | C0060                    | 100                      | 100                    | 403                       | 124971                      |                            |
|         |                          | Pool 1                   | 100                      | 100                    | 429                       | 86023                       | 29241                      |
|         |                          | Pool 2                   | 100                      | 100                    | 413                       | 124170                      | 33488                      |
| Pool 3  |                          | 100                      | 100                      | 427                    | 127682                    | 32560                       |                            |
|         | Negative Control - Blank | 100                      | N/A                      | 345                    | 44026                     |                             |                            |
| Phase 2 | Set 1                    | 1 - 1                    | 25                       | 50                     | 952                       | 89768                       |                            |
|         |                          | 1 - 2                    | 50                       | 50                     | 968                       | 77117                       |                            |
|         |                          | 1 - 3                    | 100                      | 50                     | 919                       | 65746                       |                            |
|         |                          | 1 - 4                    | 50                       | 100                    | 1044                      | 55783                       |                            |
|         |                          | 1 - 5                    | 100                      | 100                    | 972                       | 64761                       |                            |
|         |                          | 1 - 6                    | 200                      | 100                    | 940                       | 71099                       | 3652948                    |
|         |                          | 1 - 7                    | 100                      | 200                    | 915                       | 15211                       | 4405779                    |
|         |                          | 1 - 8                    | 200                      | 200                    | 1020                      | 59409                       |                            |
|         |                          | 1 - 9                    | 400                      | 200                    | 998                       | 25911                       |                            |
|         |                          |                          | Negative Control - Blank | 50                     | N/A                       | 276                         | 2590                       |

|                   |                          |     |     |     |        |         |
|-------------------|--------------------------|-----|-----|-----|--------|---------|
| Positive Controls | C0002 - 1 - 1            | 100 | 50  | 986 | 80647  |         |
|                   | C0002 - 1 - 2            | 50  | 50  | 939 | 116965 |         |
|                   | C0002 - 1 - 3            | 25  | 50  | 976 | 112881 |         |
| Set 2             | 2 - 1                    | 25  | 50  | 955 | 158710 |         |
|                   | 2 - 2                    | 50  | 50  | 887 | 100590 |         |
|                   | 2 - 3                    | 100 | 50  | 891 | 102689 |         |
|                   | 2 - 4                    | 50  | 100 | 902 | 120764 |         |
|                   | 2 - 5                    | 100 | 100 | 956 | 141994 | 6151998 |
|                   | 2 - 6                    | 200 | 100 | 941 | 159192 |         |
|                   | 2 - 7                    | 100 | 200 | 790 | 96211  |         |
|                   | 2 - 8                    | 200 | 200 | 944 | 129333 |         |
|                   | 2 - 9                    | 400 | 200 | 871 | 76195  | 7660355 |
|                   | Negative Control - Blank | 50  | N/A | N/A | 3804   |         |
| Positive Controls | C0002 - 2 - 1            | 100 | 33  | 993 | 139909 |         |
|                   | C0002 - 2 - 2            | 50  | 50  | 935 | 235429 |         |
|                   | C0002 - 2 - 3            | 25  | 50  | 876 | 129070 |         |
| Set 3             | 3 - 1                    | 25  | 50  | 854 | 82778  | 5866495 |
|                   | 3 - 2                    | 50  | 50  | 888 | 158968 |         |
|                   | 3 - 3                    | 100 | 50  | 910 | 65675  |         |
|                   | 3 - 4                    | 50  | 100 | 889 | 103671 |         |
|                   | 3 - 5                    | 100 | 100 | 882 | 78251  | 4213540 |
|                   | 3 - 6                    | 200 | 100 | 943 | 68331  |         |
|                   | 3 - 7                    | 100 | 200 | 820 | 96722  |         |
|                   | 3 - 8                    | 200 | 200 | 934 | 79036  |         |
|                   | 3 - 9                    | 400 | 200 | 917 | 82375  |         |
|                   | Negative Control - Blank | 50  | N/A | N/A | 5962   |         |
| Positive Controls | C0002 - 3 - 1            | 100 | 38  | 846 | 54117  |         |
|                   | C0002 - 3 - 2            | 50  | 32  | 881 | 96258  |         |
|                   | C0002 - 3 - 3            | 25  | 38  | 779 | 110746 |         |



**Supplementary Table 3: Individual strain enrichment results.**

Strains were enriched individually in two trials with different library sizes. For each strain the regions predicted to be targeted by probes were determined through mapping the probeset to each individual genome). Enrichment results across two trials were determined by mapping trimmed and filtered reads to genome, calculating the percentage on-target and normalizing reads and depth per kb per million reads for probe-targeted regions with at least 10 reads.

| Strain                              | Average % mapping to genome | Average % mapping to probe-targeted sites | % of targeted regions with at least 10 reads | Average % coverage of targeted regions | Average reads per kb per million reads on probe-targeted region | Average depth per kb per million reads on probe-targeted region |
|-------------------------------------|-----------------------------|-------------------------------------------|----------------------------------------------|----------------------------------------|-----------------------------------------------------------------|-----------------------------------------------------------------|
| <i>Escherichia coli</i> C0002       | 96.67<br>(±2.72)            | 95.07<br>(±1.54)                          | 100                                          | 100                                    | 18975.73<br>(±414.91)                                           | 6192.13<br>(±297.27)                                            |
| <i>Staphylococcus aureus</i> C0018  | 97.99<br>(±1.98)            | 94.89<br>(±2.31)                          | 100                                          | 100                                    | 67615.06<br>(±4360.20)                                          | 19968.28<br>(±2670.37)                                          |
| <i>Klebsiella pneumoniae</i> C0050  | 95.60<br>(±3.96)            | 85.74<br>(±4.68)                          | 100                                          | 100                                    | 40531.43<br>(±2516.77)                                          | 17315.24<br>(±1630.66)                                          |
| <i>Pseudomonas aeruginosa</i> C0060 | 91.45<br>(±5.49)            | 90.73<br>(±0.95)                          | 100                                          | 100                                    | 22725.67<br>(±32.97)                                            | 6497.48<br>(±61.46)                                             |

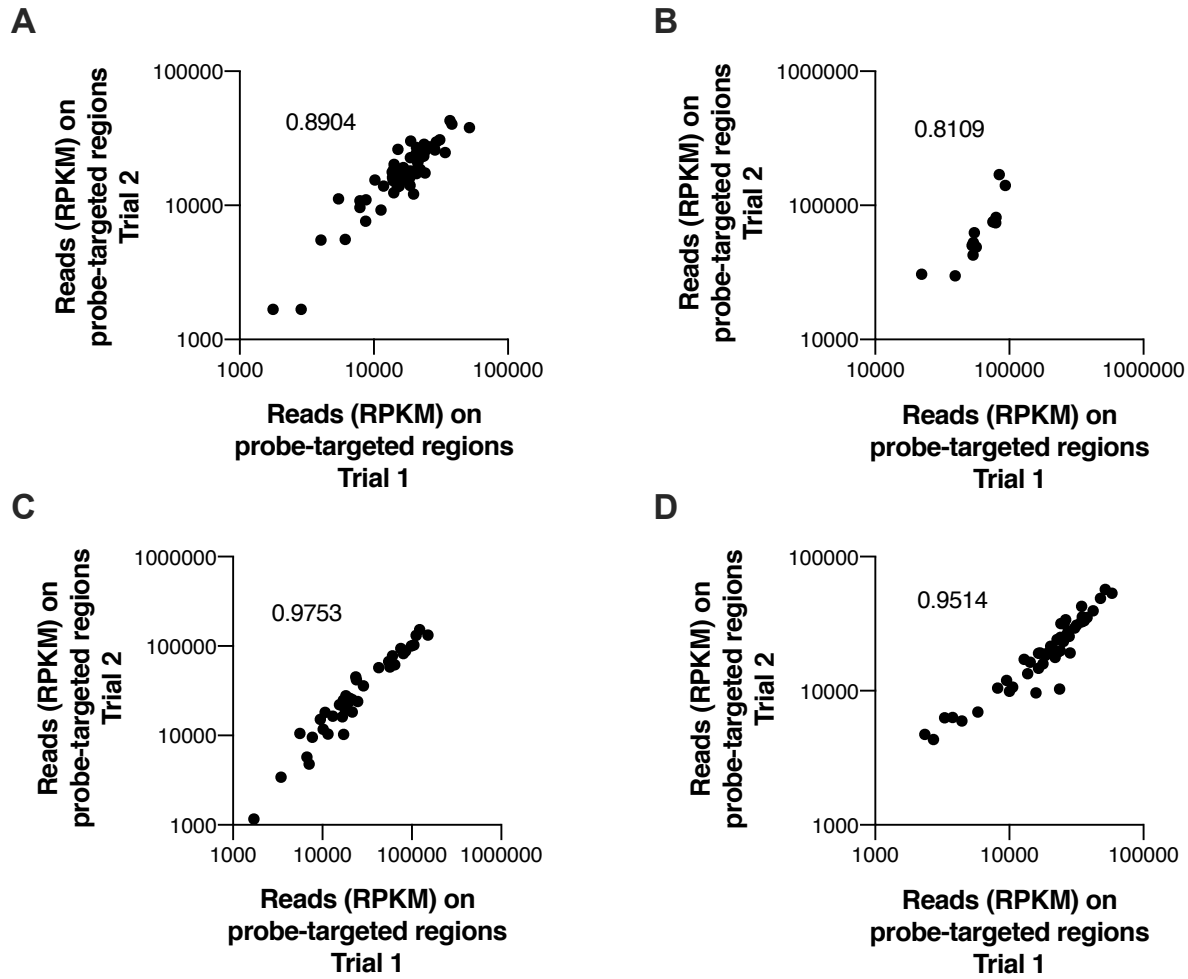

**Supplementary Figure 2: Consistency in library prep methods and trials.**

Comparing read counts normalized in subsampled individual enrichment trials through different library prep methods. Reads from enrichment of individual genomes of *Escherichia coli* C0002 (A), *Staphylococcus aureus* C0018 (B), *Klebsiella pneumoniae* C0050 (C) and *Pseudomonas aeruginosa* C0060 (D) in Trial 2 were subsampled to same depth as reads in Trial 1. The reads were mapped to the respective bacterial genome, filtered for mapping quality and then the number of reads on each RGI and probe-targeted region were counted and normalized per kb per million reads. Pearson correlation coefficients are shown.

**Supplementary Table 4: Pooling of genomic DNA to create “mock metagenomes”**

We pooled various nanogram amounts of genomic DNA from bacteria and estimated the percentage of each strain in the respective pools based on total genome size of each strain. With reads generated through shotgun sequencing and after enrichment, we calculated the percentage of reads mapping to a particular genome by mapping to a combined reference of the genomes used in a given pool and counting the reads that mapped to each respective genome (= reads mapping to genome A / reads mapping to all genomes). The percentage represented by targeted regions of each genome in each pool is determined by taking the percentage of each isolate’s genome that is targeted by probes and the percentage of reads that map to that particular genome from the shotgun sequencing data.

| Pool              | Strain | Amount of genomic DNA pooled (ng) | Estimated % of pool | % of reads mapping from shotgun | Targeted % of pool | % of reads mapping from enriched |
|-------------------|--------|-----------------------------------|---------------------|---------------------------------|--------------------|----------------------------------|
| Trial 1<br>Pool 1 | C0002  | 312                               | 21.98               | 24.82                           | 0.24               | 52.55                            |
|                   | C0018  | 312                               | 40.00               | 12.06                           | 0.060              | 32.12                            |
|                   | C0050  | 312                               | 20.74               | 27.18                           | 0.068              | 8.86                             |
|                   | C0060  | 312                               | 17.28               | 35.93                           | 0.24               | 6.47                             |
| Trial 2<br>Pool 1 | C0002  | 112                               | 18.77               | 22.30                           | 0.22               | 33.95                            |
|                   | C0018  | 174                               | 53.01               | 65.29                           | 0.33               | 62.88                            |
|                   | C0050  | 106                               | 16.79               | 4.39                            | 0.011              | 1.54                             |
|                   | C0060  | 88                                | 11.43               | 8.02                            | 0.053              | 1.63                             |
| Trial 1<br>Pool 2 | C0002  | 1250                              | 66.30               | 64.73                           | 0.63               | 71.26                            |
|                   | C0018  | 180                               | 17.22               | 11.96                           | 0.060              | 19.69                            |
|                   | C0050  | 180                               | 9.07                | 11.28                           | 0.028              | 4.75                             |
|                   | C0060  | 180                               | 7.41                | 12.03                           | 0.079              | 4.30                             |
| Trial 2<br>Pool 2 | C0002  | 264                               | 48.04               | 57.31                           | 0.56               | 65.39                            |
|                   | C0018  | 102                               | 33.92               | 35.54                           | 0.18               | 33.24                            |
|                   | C0050  | 62                                | 10.75               | 1.66                            | 0.0042             | 0.44                             |
|                   | C0060  | 51                                | 7.29                | 5.49                            | 0.036              | 0.94                             |
| Trial 1<br>Pool 3 | C0002  | 125                               | 11.01               | 13.91                           | 0.13               | 38.50                            |
|                   | C0006  | 125                               | 10.70               | 24.75                           | 0.052              | 2.34                             |
|                   | C0018  | 125                               | 19.88               | 6.54                            | 0.033              | 11.62                            |
|                   | C0033  | 125                               | 19.88               | 11.59                           | 0.060              | 22.81                            |
|                   | C0050  | 125                               | 10.40               | 12.75                           | 0.032              | 2.73                             |
|                   | C0060  | 125                               | 8.56                | 16.40                           | 0.11               | 2.16                             |
|                   | C0094  | 125                               | 11.01               | 6.90                            | 0.066              | 18.78                            |
|                   | C0292  | 125                               | 8.56                | 7.15                            | 0.047              | 1.07                             |
| Trial 2<br>Pool 3 | C0002  | 46                                | 8.65                | 9.84                            | 0.095              | 14.80                            |
|                   | C0006  | 83                                | 8.16                | 14.44                           | 0.030              | 1.53                             |
|                   | C0018  | 43                                | 28.17               | 11.49                           | 0.057              | 12.49                            |
|                   | C0033  | 36                                | 28.15               | 34.36                           | 0.18               | 34.58                            |
|                   | C0050  | 45                                | 7.68                | 0.60                            | 0.0015             | 0.13                             |
|                   | C0060  | 83                                | 5.20                | 2.02                            | 0.013              | 0.42                             |
|                   | C0094  | 46                                | 8.78                | 25.21                           | 0.24               | 35.67                            |
|                   | C0292  | 36                                | 5.21                | 2.04                            | 0.013              | 0.39                             |



**Supplementary Table 5: Enrichment results to probe-targeted regions in pooled samples**

Genomic DNA from individual strains was pooled in various ratios to produce “mock metagenomes” for enrichment. For each strain, the regions predicted be targeted by probes (determined through mapping the probeset to each individual genome) are considered the targeted region for analysis. Trimmed and filtered reads from paired enriched and shotgun pools were subsampled to same read depth. The resulting reads were mapped to the individual strain’s genomes, counted on-target and normalized per kb per million reads mapping. Percentage on-target, percentage of probe-targeted regions with at least 10 reads as well as their percent coverage, average reads, and average depth were determined for each strain at the probe-targeted region level. The fold enrichment is based on all genes regardless of read counts.

| Sample                     | Strain | % of reads in Pool | % Mapping to probe-targeted regions | % of probe-targeted regions with reads | % coverage of probe-targeted regions | Average reads per kb per million reads | Average depth per kb per million reads | Fold-enrichment in reads (average and range) |
|----------------------------|--------|--------------------|-------------------------------------|----------------------------------------|--------------------------------------|----------------------------------------|----------------------------------------|----------------------------------------------|
| Trial 1<br>Pool 1 Enriched | C0002  | 52.75              | 93.06                               | 100                                    | 100                                  | 19097.95                               | 6091.42                                | 810.18 (2.66 – 16590.95)                     |
|                            | C0018  | 20.05              | 94.84                               | 100                                    | 100                                  | 67393.09                               | 19715.42                               | 135.84 (31.11 – 291.78)                      |
|                            | C0050  | 18.73              | 85.44                               | 90                                     | 100                                  | 41944.82                               | 16304.97                               | 1341.88 (3.77 – 23020.26)                    |
|                            | C0060  | 3.40               | 90.26                               | 91.67                                  | 98.73                                | 24920.46                               | 6697.48                                | 994.87 (0 – 21945.61)                        |
| Trial 1 Pool 1<br>Shotgun  | C0002  | 21.61              | 1.56                                | 18.46                                  | 90.13                                | 671.09                                 | 153.52                                 |                                              |
|                            | C0018  | 10.32              | 0.70                                | 15.38                                  | 88.03                                | 820.59                                 | 161.15                                 |                                              |
|                            | C0050  | 23.56              | 0.82                                | 25.00                                  | 100                                  | 762.34                                 | 190.87                                 |                                              |
|                            | C0060  | 28.70              | 0.81                                | 12.50                                  | 84.54                                | 301.55                                 | 44.92                                  |                                              |
| Trial 2 Pool 1<br>Enriched | C0002  | 35.84              | 98.90                               | 96.92                                  | 100                                  | 20081.94                               | 6630.47                                | 4972.95 (2.84 – 35942.31)                    |
|                            | C0018  | 56.55              | 98.56                               | 100                                    | 100                                  | 74814.49                               | 24542.74                               | 144.41 (41.36 – 332.17)                      |
|                            | C0050  | 7.72               | 97.63                               | 47.50                                  | 99.75                                | 74609.44                               | 24141.06                               | 18991.42 (0 – 170582.07)                     |
|                            | C0060  | 1.31               | 93.37                               | 47.92                                  | 83.22                                | 30865.24                               | 7310.50                                | 17166.87 (0 – 70414.91)                      |
| Trial 2 Pool 1<br>Shotgun  | C0002  | 23.52              | 1.49                                | 1.54                                   | 91.65                                | 471.34                                 | 30.86                                  |                                              |
|                            | C0018  | 57.30              | 0.71                                | 76.92                                  | 79.03                                | 570.56                                 | 98.30                                  |                                              |
|                            | C0050  | 5.19               | 0.88                                | 0                                      | 0                                    | 0                                      | 0                                      |                                              |
|                            | C0060  | 6.65               | 0.65                                | 0                                      | 0                                    | 0                                      | 0                                      |                                              |
| Trial 1 Pool 2<br>Enriched | C0002  | 68.39              | 77.35                               | 96.92                                  | 100                                  | 15928.54                               | 4982.54                                | 57.09 (2.57 – 192.18)                        |
|                            | C0018  | 12.69              | 79.11                               | 100                                    | 100                                  | 56570.38                               | 16316.11                               | 2614.81 (15.93 – 32565.71)                   |
|                            | C0050  | 12.61              | 74.13                               | 75.00                                  | 99.93                                | 41711.08                               | 15702.37                               | 2727.71 (0 – 39495.86)                       |
|                            | C0060  | 2.34               | 38.95                               | 70.83                                  | 96.27                                | 11523.24                               | 2820.94                                | 2382.94 (0 – 19387.19)                       |
| Trial 1 Pool 2<br>Shotgun  | C0002  | 58.69              | 1.34                                | 58.46                                  | 96.92                                | 321.15                                 | 81.43                                  |                                              |
|                            | C0018  | 10.64              | 0.74                                | 30.77                                  | 78.51                                | 896.24                                 | 141.82                                 |                                              |
|                            | C0050  | 11.48              | 1.33                                | 20                                     | 100                                  | 1745.41                                | 464.15                                 |                                              |
|                            | C0060  | 9.72               | 0.75                                | 2.08                                   | 56.38                                | 266.69                                 | 18.15                                  |                                              |

|                            |       |       |       |       |          |          |                          |                            |
|----------------------------|-------|-------|-------|-------|----------|----------|--------------------------|----------------------------|
| Trial 2 Pool 2<br>Enriched | C0002 | 65.64 | 98.29 | 96.92 | 100      | 19970.52 | 6708.67                  | 1190.08 (7.74 – 29085.20)  |
|                            | C0018 | 28.13 | 98.15 | 100   | 100      | 75034.93 | 24899.52                 | 210.58 (32.41 – 596.02)    |
|                            | C0050 | 10.26 | 98.23 | 47.50 | 100      | 77537.34 | 26906.17                 | 8270.19 (0 – 50937.25)     |
|                            | C0060 | 0.73  | 88.86 | 27.08 | 78.56    | 37440.00 | 8936.77                  | 18933.20 (0 – 106732.35)   |
| Trial 2 Pool 2<br>Shotgun  | C0002 | 56.47 | 1.38  | 20.00 | 73.49    | 404.35   | 72.86                    |                            |
|                            | C0018 | 29.19 | 0.57  | 23.08 | 73.76    | 698.55   | 125.73                   |                            |
|                            | C0050 | 3.01  | 4.51  | 2.50  | 79.03    | 10409.44 | 2093.37                  |                            |
|                            | C0060 | 4.27  | 0.73  | 0     | 0        | 0        | 0                        |                            |
| Trial 1 Pool 3<br>Enriched | C0002 | 38.74 | 94.12 | 98.46 | 100      | 19755.27 | 6312.06                  | 2493.04 (3.05 – 22767.27)  |
|                            | C0006 | 13.66 | 84.08 | 91.43 | 100      | 51010.68 | 22066.06                 | 3295.94 (0 – 61249.67)     |
|                            | C0018 | 29.65 | 95.22 | 100   | 100      | 63154.77 | 15991.26                 | 2909.12 (54.61 – 35638.08) |
|                            | C0033 | 33.17 | 94.82 | 100   | 100      | 56232.72 | 13178.66                 | 156.78 (28.17 – 314.91)    |
|                            | C0050 | 14.84 | 85.22 | 92.5  | 100      | 43478.45 | 18486.32                 | 2475.78 (4.87 – 47799.65)  |
|                            | C0060 | 2.45  | 91.97 | 89.58 | 98.78    | 26022.10 | 7430.52                  | 3742.84 (3.65 – 62302.44)  |
|                            | C0094 | 35.52 | 92.59 | 98.44 | 100      | 19949.59 | 6561.88                  | 3526.16 (2.48 – 23220.26)  |
| C0292                      | 2.78  | 84.96 | 91.67 | 99.29 | 28432.58 | 10574.24 | 4014.72 (0 – 54962.31)   |                            |
| Trial 1 Pool 3<br>Shotgun  | C0002 | 9.83  | 1.63  | 3.08  | 88.69    | 1449.60  | 308.97                   |                            |
|                            | C0006 | 25.19 | 0.36  | 8.57  | 95.63    | 3450.36  | 1206.18                  |                            |
|                            | C0018 | 11.94 | 0.51  | 7.69  | 68.26    | 413.96   | 50.49                    |                            |
|                            | C0033 | 12.81 | 0.59  | 7.14  | 68.25    | 424.67   | 47.08                    |                            |
|                            | C0050 | 24.09 | 0.48  | 12.5  | 93.25    | 853.91   | 300.04                   |                            |
|                            | C0060 | 17.84 | 0.90  | 4.17  | 64.69    | 222.28   | 16.28                    |                            |
|                            | C0094 | 8.25  | 1.67  | 3.125 | 88.69    | 1726.91  | 368.08                   |                            |
| C0292                      | 16.78 | 0.94  | 4.17  | 64.69 | 1141.24  | 84.87    |                          |                            |
| Trial 2 Pool 3<br>Enriched | C0002 | 32.65 | 98.09 | 96.92 | 99.97    | 20307.57 | 6847.06                  | 7369.15 (4.14 – 66339.3)   |
|                            | C0006 | 7.75  | 90.49 | 51.43 | 99.50    | 86220.71 | 36708.00                 | 25683.46 (0 – 271673.69)   |
|                            | C0018 | 45.46 | 97.45 | 100   | 100      | 65485.29 | 17173.26                 | 5819.09 (29.42 – 74023.04) |
|                            | C0033 | 52.11 | 97.53 | 100   | 100      | 58846.80 | 13719.18                 | 698.58 (72.34 – 8084.37)   |
|                            | C0050 | 8.22  | 92.65 | 50.00 | 99.55    | 74207.10 | 29767.85                 | 21813 (0 – 256173.72)      |
|                            | C0060 | 0.86  | 90.00 | 27.08 | 79.68    | 39544.66 | 8226.37                  | 16172.91 (0 – 70505.29)    |
|                            | C0094 | 34.91 | 97.65 | 96.87 | 100      | 20612.44 | 7021.48                  | 7479.75 (2.67 – 61794.38)  |
| C0292                      | 0.89  | 89.30 | 29.17 | 80.95 | 44281.92 | 13985.84 | 18128.93 (0 – 120321.02) |                            |
| Trial 2 Pool 3<br>Shotgun  | C0002 | 16.88 | 1.38  | 0     | 0        | 0        | 0                        |                            |
|                            | C0006 | 15.36 | 0.47  | 0     | 0        | 0        | 0                        |                            |
|                            | C0018 | 41.07 | 0.70  | 38.46 | 73.84    | 525.28   | 55.49                    |                            |
|                            | C0033 | 44.54 | 0.79  | 50.00 | 77.22    | 703.43   | 113.13                   |                            |
|                            | C0050 | 12.76 | 0.64  | 0     | 0        | 0        | 0                        |                            |

|       |       |      |      |       |        |       |
|-------|-------|------|------|-------|--------|-------|
| C0060 | 4.54  | 0.77 | 0    | 0     | 0      | 0     |
| C0094 | 21.50 | 1.23 | 1.56 | 68.13 | 404.24 | 25.04 |
| C0292 | 4.59  | 0.86 | 0    | 0     | 0      | 0     |

---

U

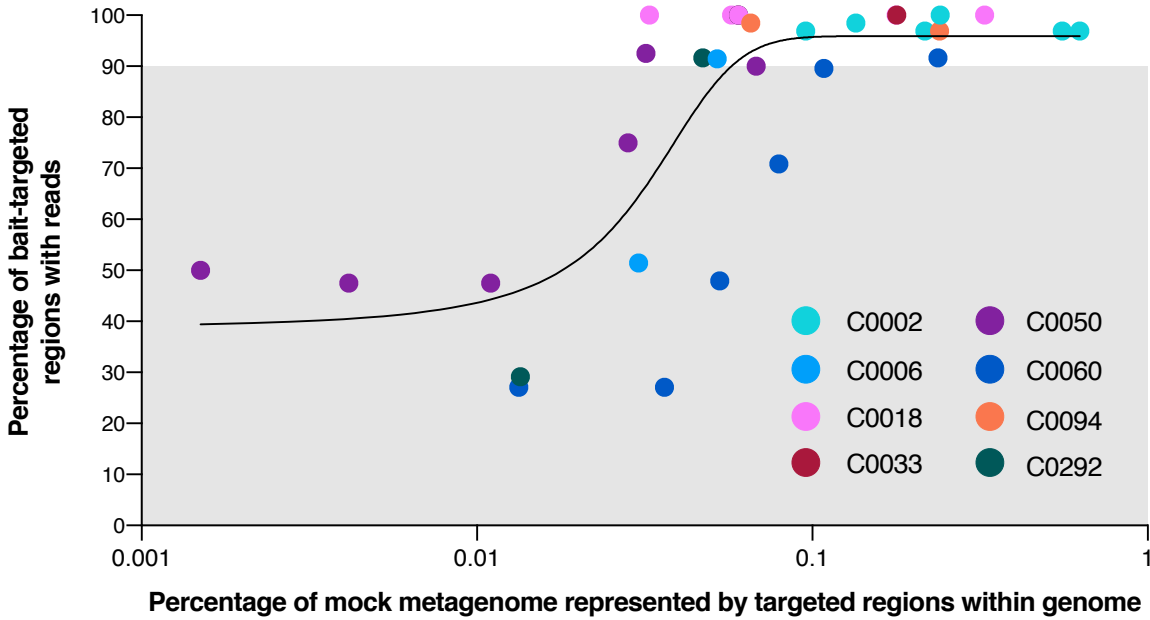

Supplementary Figure 3

**Supplementary Figure 3: Sensitivity in recovery of bait-targeted regions with reads.** Using the estimated percentage of a pool represented by each isolate's genome from the percentage of reads mapping in the shotgun dataset, the estimate percentage of the mock metagenome represented by that isolate's bait-targeted complement was determined. This represents the limit of detection or sensitivity for each isolate/genome tested. The Y-axis is the percentage of probe-targeted regions of a given isolate's genome that were successfully captured/recovered with at least 10 reads after filtering.



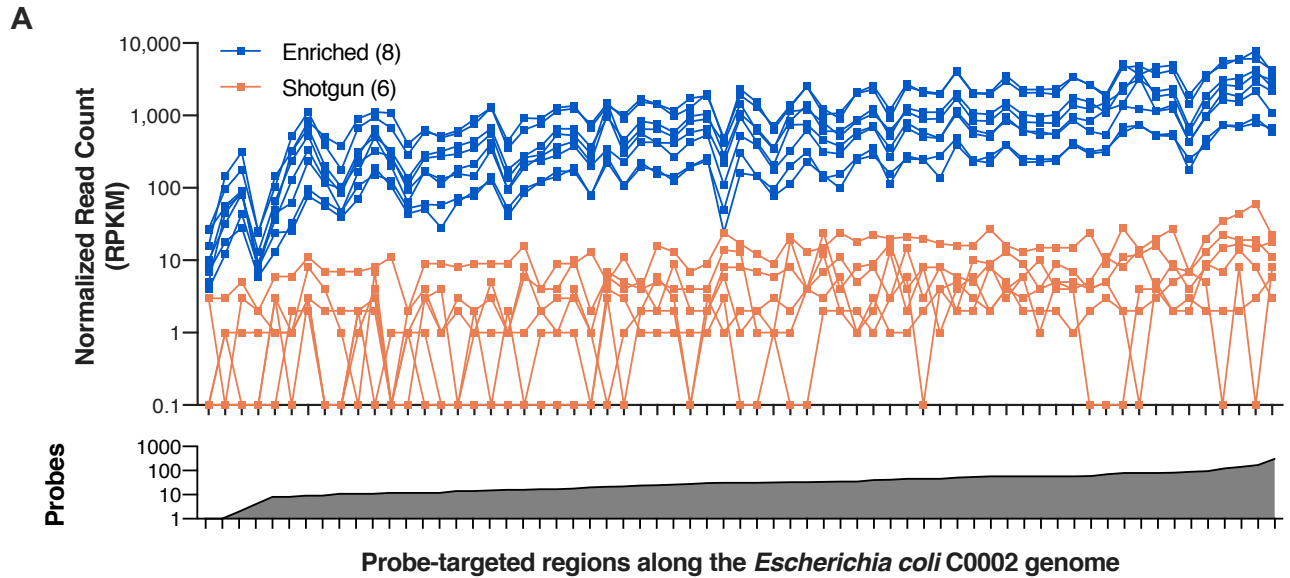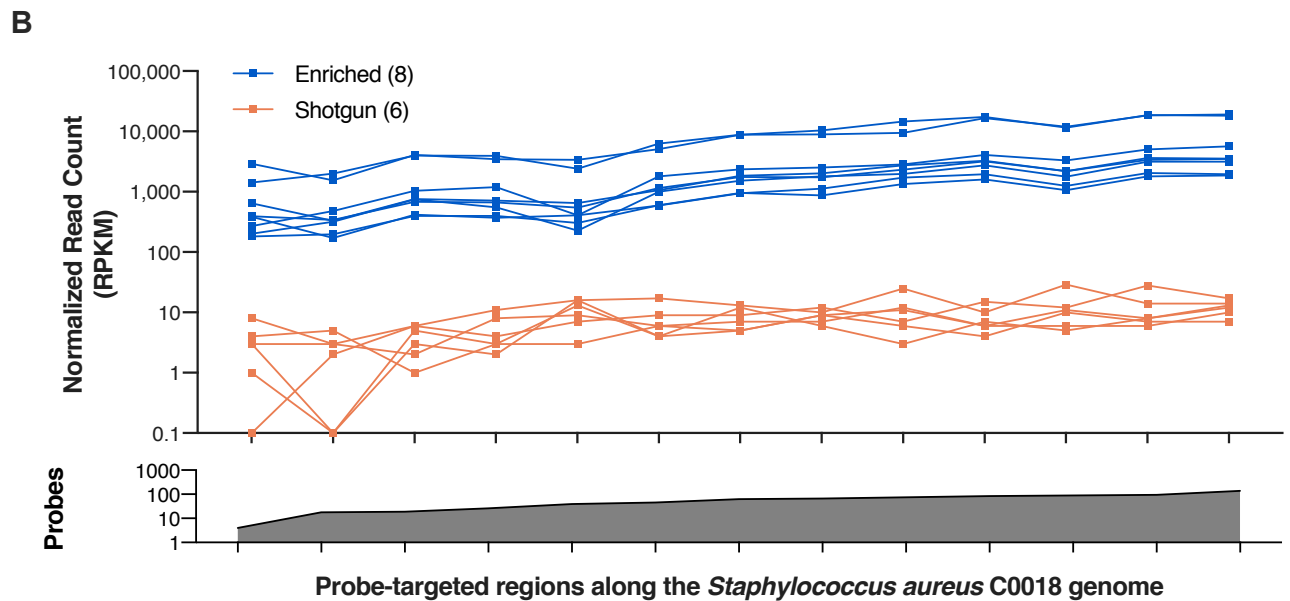

**Supplementary Figure 4: Enrichment results in higher read counts on antibiotic resistance genes compared to shotgun sequencing.** Raw read counts at each probe-targeted region within the *Escherichia coli* C0002 genome (A) and *Staphylococcus aureus* C0018 genome (B) in enriched and shotgun samples including individual and “mock metagenomes” of multiple strains. Among enriched and shotgun pairs, reads were subsampled to equal depths and mapped to the individual strain’s genome. The predicted number of probes for each region along the genome are shown in the panels below. The Y axes are in the logarithmic scale.

**Supplementary Table 6: Control enrichment with *Escherichia coli* C0002.**

Enrichment results from the positive control of *E. coli* C0002 control used in Phase 2. Trimmed and deduplicated reads were mapped to CARD using RGIBWT, filtered by genes with probe coverage, an average read mapping quality  $\geq 11$ , and percent length coverage of a gene with reads  $\geq 80\%$ .

|                  | Probes (ng) | Library (ng) | % reads mapping to CARD | Total number of genes | Genes with map quality $\geq 11$ | Genes with probes | Genes with length coverage with reads $\geq 80\%$ | Genes with probes and map quality $\geq 11$ | Genes passing all filters |
|------------------|-------------|--------------|-------------------------|-----------------------|----------------------------------|-------------------|---------------------------------------------------|---------------------------------------------|---------------------------|
| C0002<br>– Set 1 | 25          | 50           | 63.52                   | 164                   | 51                               | 53                | 86                                                | 39                                          | 36                        |
|                  | 50          | 50           | 64.81                   | 164                   | 54                               | 53                | 84                                                | 39                                          | 36                        |
|                  | 100         | 50           | 63.75                   | 154                   | 53                               | 53                | 80                                                | 40                                          | 36                        |
| C0002<br>– Set2  | 25          | 50           | 61.10                   | 179                   | 62                               | 54                | 82                                                | 42                                          | 36                        |
|                  | 50          | 50           | 65.77                   | 195                   | 60                               | 59                | 84                                                | 44                                          | 36                        |
|                  | 100         | 33           | 60.31                   | 170                   | 59                               | 57                | 87                                                | 42                                          | 36                        |
| C0002<br>– Set 3 | 25          | 38           | 65.46                   | 182                   | 58                               | 57                | 86                                                | 39                                          | 36                        |
|                  | 50          | 32           | 65.77                   | 172                   | 58                               | 53                | 88                                                | 40                                          | 36                        |
|                  | 100         | 38           | 67.98                   | 147                   | 54                               | 56                | 83                                                | 42                                          | 36                        |

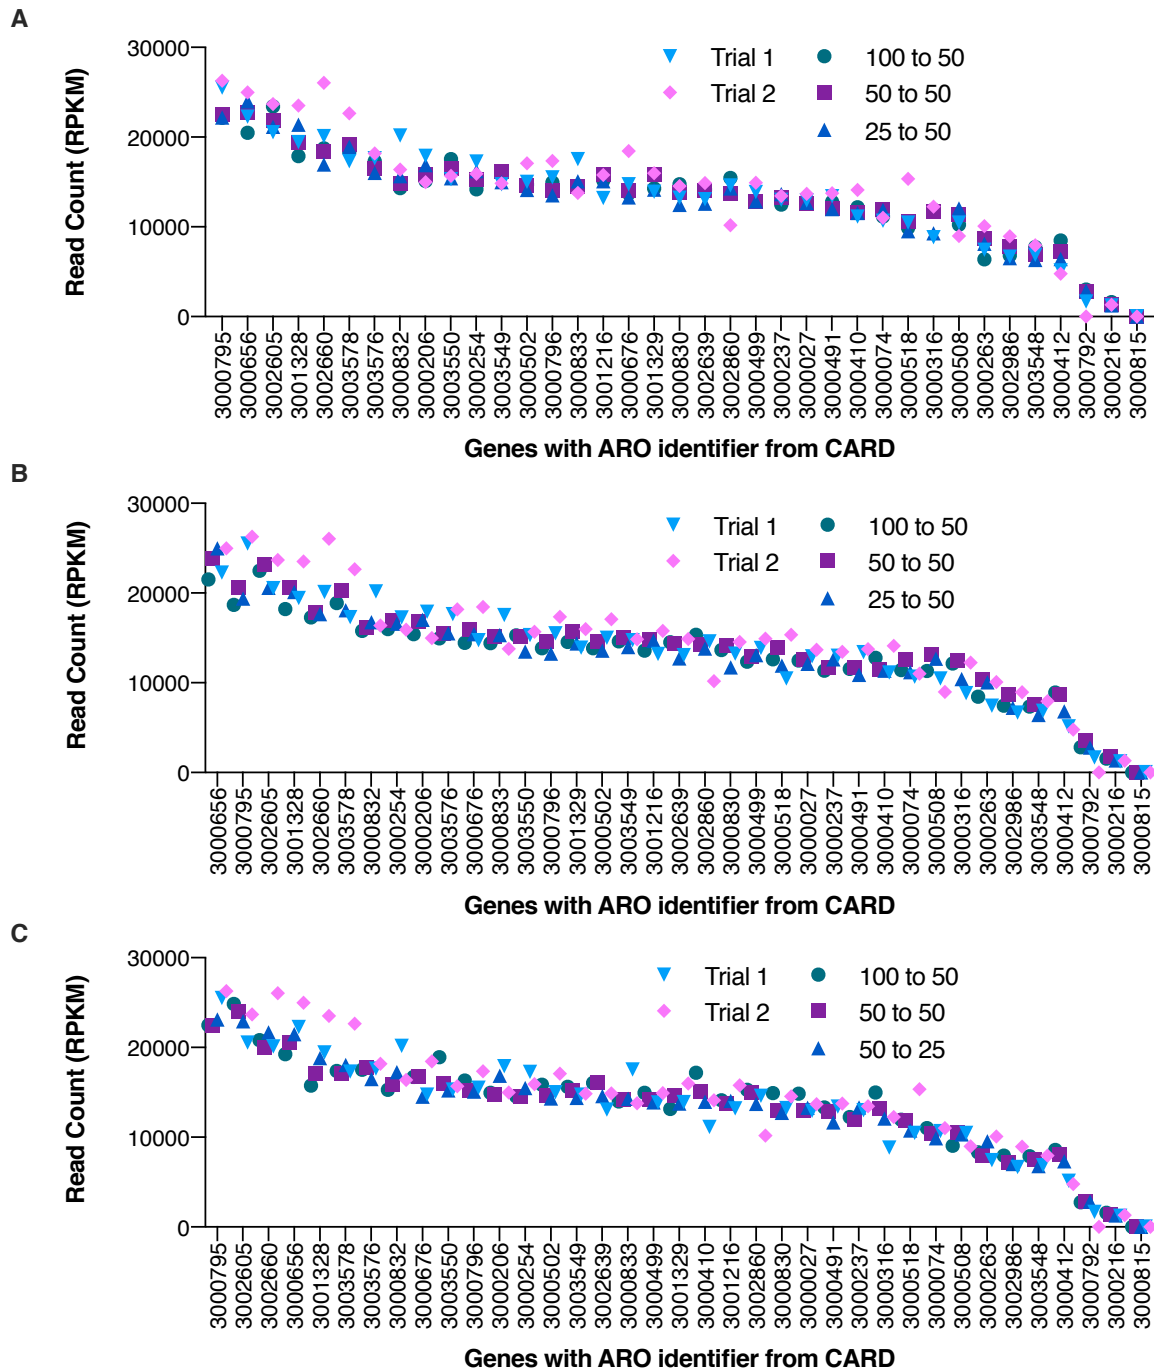

**Supplementary Figure 5: Genes identified in positive control enrichments.**

Normalized read counts from C0002 control enrichments from *rgi bwt* results from 3 samples in each Set (A) Set 1, B) Set 2, C) Set 3) to the two trials of individual enrichment. Genes with reads were filtered based on read mapping quality greater than or equal to 11, percent length coverage of a gene with reads greater than or equal to 80% and genes with probes mapping. Reads were normalized per kb of reference gene per million reads mapping. Genes are ordered by sum of read counts from highest to lowers (left to right) with the ARO identifier shown along the X axis

**Supplementary Table 7: Phase 2 enrichment results with the full number of reads.**

For the enriched samples, trimmed and deduplicated reads were mapped to CARD using RGIBWT, filtered by genes with at least 10 reads, those with probes, an average read mapping quality  $\geq 11$ , and length coverage of a gene with reads  $\geq 10\%$ . For the shotgun samples, trimmed and deduplicated reads were mapped to CARD using RGIBWT, filtered by genes with an average read mapping quality  $\geq 11$  and read length coverage of a gene  $\geq 10\%$ . EN = enriched, UN = shotgun.

|                     | Probes<br>(ng) | Library<br>(ng) | Reads<br>mapping<br>to CARD<br>(%) | Total<br>number<br>of genes | Genes<br>with<br>read<br>map<br>quality<br>$\geq 11$ | Genes<br>with<br>probes | Genes with<br>read length<br>coverage<br>$\geq 10\%$ | Genes<br>passing<br>all<br>filters |
|---------------------|----------------|-----------------|------------------------------------|-----------------------------|------------------------------------------------------|-------------------------|------------------------------------------------------|------------------------------------|
| <b>Sample Set 1</b> |                |                 |                                    |                             |                                                      |                         |                                                      |                                    |
|                     | 25             | 50              | 55.36                              | 60                          | 50                                                   | 51                      | 58                                                   | 48                                 |
|                     | 50             | 50              | 65.73                              | 62                          | 54                                                   | 52                      | 60                                                   | 49                                 |
|                     | 100            | 50              | 55.59                              | 60                          | 50                                                   | 50                      | 60                                                   | 48                                 |
|                     | 50             | 100             | 65.63                              | 56                          | 47                                                   | 46                      | 55                                                   | 43                                 |
| EN                  | 100            | 100             | 51.85                              | 61                          | 51                                                   | 51                      | 60                                                   | 48                                 |
|                     | 200            | 100             | 58.21                              | 64                          | 56                                                   | 53                      | 61                                                   | 49                                 |
|                     | 100            | 200             | 51.52                              | 34                          | 26                                                   | 27                      | 34                                                   | 25                                 |
|                     | 200            | 200             | 66.57                              | 60                          | 50                                                   | 48                      | 59                                                   | 45                                 |
|                     | 400            | 200             | 49.44                              | 45                          | 37                                                   | 36                      | 43                                                   | 33                                 |
| UN                  | 200            | 100             | 0.030                              | 26                          | 19                                                   | N/A                     | 24                                                   | 18                                 |
|                     | 100            | 200             | 0.030                              | 32                          | 22                                                   | N/A                     | 29                                                   | 20                                 |
| <b>Sample Set 2</b> |                |                 |                                    |                             |                                                      |                         |                                                      |                                    |
|                     | 25             | 50              | 64.07                              | 78                          | 67                                                   | 64                      | 76                                                   | 61                                 |
|                     | 50             | 50              | 64.60                              | 72                          | 64                                                   | 61                      | 71                                                   | 58                                 |
|                     | 100            | 50              | 57.96                              | 75                          | 64                                                   | 61                      | 74                                                   | 57                                 |
|                     | 50             | 100             | 46.75                              | 78                          | 66                                                   | 66                      | 76                                                   | 62                                 |
| EN                  | 100            | 100             | 58.99                              | 79                          | 69                                                   | 64                      | 77                                                   | 61                                 |
|                     | 200            | 100             | 44.52                              | 85                          | 72                                                   | 69                      | 80                                                   | 63                                 |
|                     | 100            | 200             | 60.43                              | 76                          | 66                                                   | 62                      | 73                                                   | 59                                 |
|                     | 200            | 200             | 47.27                              | 82                          | 71                                                   | 67                      | 81                                                   | 64                                 |
|                     | 400            | 200             | 41.22                              | 70                          | 59                                                   | 58                      | 69                                                   | 55                                 |
| UN                  | 400            | 200             | 0.016                              | 41                          | 28                                                   | N/A                     | 37                                                   | 27                                 |
|                     | 100            | 100             | 0.032                              | 34                          | 24                                                   | N/A                     | 32                                                   | 23                                 |
| <b>Sample Set 3</b> |                |                 |                                    |                             |                                                      |                         |                                                      |                                    |
|                     | 25             | 50              | 50.16                              | 72                          | 63                                                   | 61                      | 70                                                   | 58                                 |
|                     | 50             | 50              | 38.19                              | 79                          | 66                                                   | 64                      | 76                                                   | 60                                 |
|                     | 100            | 50              | 51.73                              | 69                          | 59                                                   | 59                      | 68                                                   | 55                                 |
|                     | 50             | 100             | 29.46                              | 78                          | 66                                                   | 63                      | 76                                                   | 60                                 |
| EN                  | 100            | 100             | 40.28                              | 74                          | 65                                                   | 60                      | 72                                                   | 57                                 |
|                     | 200            | 100             | 39.06                              | 67                          | 57                                                   | 57                      | 67                                                   | 53                                 |
|                     | 100            | 200             | 29.97                              | 69                          | 57                                                   | 58                      | 68                                                   | 54                                 |
|                     | 200            | 200             | 40.32                              | 72                          | 60                                                   | 58                      | 71                                                   | 55                                 |
|                     | 400            | 200             | 43.74                              | 69                          | 58                                                   | 56                      | 67                                                   | 53                                 |
| UN                  | 100            | 100             | 0.031                              | 29                          | 19                                                   | N/A                     | 26                                                   | 19                                 |
|                     | 25             | 50              | 0.031                              | 34                          | 23                                                   | N/A                     | 30                                                   | 22                                 |

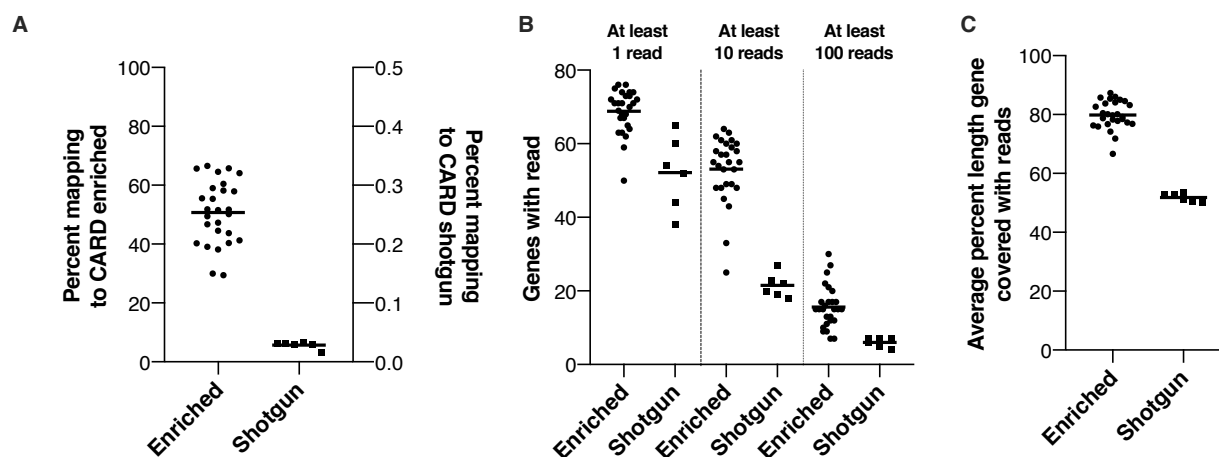

**Supplementary Figure 6: Comparing enriched and shotgun ARG recovery.** For the enriched and shotgun samples, the full number of reads for each sample were mapped to CARD using *rgi bwt*. A) The percentage of reads mapping to CARD. B) Genes were counted with at least 1, 10 and 100 reads and filtered for mapping quality ( $\geq 11$ ), percent coverage by reads ( $\geq 10$ ) and probes mapping (only for the enriched samples). C) The average percent coverage of all genes with at least 10 reads in each sample after the same filters used in B.

**Supplementary Table 8: Phase 2 enrichment results with subsampled reads.**

For the enriched samples, reads were subsampled to 22,324 reads and mapped to CARD using RGIBWT. Results were filtered by genes with at least 10 reads, those with probes, an average read mapping quality  $\geq 11$ , and length coverage of a gene with reads  $\geq 10\%$ . For the shotgun samples, reads were subsampled to their paired enriched sample and mapped to CARD using RGIBWT. Results were filtered by genes with an average read mapping quality  $\geq 11$  and read length coverage of a gene  $\geq 10\%$ . EN = enriched, UN = shotgun.

|                     | Probes (ng) | Library (ng) | Reads mapping to CARD (%) | Total number of genes | Genes with read map quality $\geq 11$ | Genes with probes | Genes with read length coverage $\geq 10\%$ | Genes passing all filters |
|---------------------|-------------|--------------|---------------------------|-----------------------|---------------------------------------|-------------------|---------------------------------------------|---------------------------|
| <b>Sample Set 1</b> |             |              |                           |                       |                                       |                   |                                             |                           |
|                     | 25          | 50           | 55.24                     | 34                    | 26                                    | 27                | 34                                          | 25                        |
|                     | 50          | 50           | 65.84                     | 39                    | 31                                    | 31                | 37                                          | 28                        |
|                     | 100         | 50           | 56.11                     | 46                    | 37                                    | 37                | 45                                          | 34                        |
| EN                  | 50          | 100          | 66.01                     | 39                    | 32                                    | 32                | 39                                          | 30                        |
|                     | 100         | 100          | 51.94                     | 40                    | 32                                    | 32                | 37                                          | 28                        |
|                     | 200         | 100          | 57.93                     | 38                    | 30                                    | 30                | 37                                          | 28                        |
|                     | 100         | 200          | 51.52                     | 34                    | 26                                    | 27                | 34                                          | 25                        |
|                     | 200         | 200          | 66.99                     | 42                    | 34                                    | 33                | 39                                          | 30                        |
|                     | 400         | 200          | 49.39                     | 33                    | 26                                    | 26                | 33                                          | 24                        |
| UN                  | 200         | 100          | 0.038                     | 2                     | 2                                     | N/A               | 2                                           | 2                         |
|                     | 100         | 200          | 0.054                     | 0                     | 0                                     | N/A               | 0                                           | 0                         |
| <b>Sample Set 2</b> |             |              |                           |                       |                                       |                   |                                             |                           |
| EN                  | 25          | 50           | 64.25                     | 41                    | 33                                    | 34                | 40                                          | 32                        |

|                     |     |     |       |    |    |     |    |    |
|---------------------|-----|-----|-------|----|----|-----|----|----|
|                     | 50  | 50  | 64.11 | 43 | 36 | 35  | 40 | 31 |
|                     | 100 | 50  | 58.80 | 43 | 36 | 35  | 43 | 33 |
|                     | 50  | 100 | 46.95 | 40 | 32 | 33  | 38 | 29 |
|                     | 100 | 100 | 59.13 | 42 | 35 | 34  | 41 | 31 |
|                     | 200 | 100 | 44.64 | 45 | 35 | 34  | 41 | 31 |
|                     | 100 | 200 | 60.55 | 50 | 42 | 42  | 49 | 39 |
|                     | 200 | 200 | 47.29 | 45 | 38 | 37  | 45 | 35 |
|                     | 400 | 200 | 41.56 | 43 | 34 | 35  | 41 | 32 |
| UN                  | 400 | 200 | 0.029 | 1  | 1  | N/A | 1  | 1  |
|                     | 100 | 100 | 0.035 | 2  | 2  | N/A | 2  | 2  |
| <b>Sample Set 3</b> |     |     |       |    |    |     |    |    |
| EN                  | 25  | 50  | 50.64 | 37 | 29 | 30  | 36 | 27 |
|                     | 50  | 50  | 37.85 | 27 | 19 | 20  | 27 | 18 |
|                     | 100 | 50  | 51.41 | 36 | 27 | 28  | 33 | 24 |
|                     | 50  | 100 | 29.56 | 29 | 21 | 22  | 28 | 20 |
|                     | 100 | 100 | 40.77 | 34 | 26 | 26  | 33 | 24 |
|                     | 200 | 100 | 38.86 | 37 | 30 | 30  | 37 | 28 |
|                     | 100 | 200 | 30.08 | 31 | 23 | 24  | 30 | 21 |
|                     | 200 | 200 | 40.62 | 34 | 26 | 26  | 32 | 23 |
|                     | 400 | 200 | 44.35 | 37 | 30 | 29  | 35 | 26 |
| UN                  | 100 | 100 | 0.023 | 0  | 0  | N/A | 0  | 0  |
|                     | 25  | 50  | 0.023 | 1  | 1  | N/A | 1  | 1  |

**Supplementary Table 9: Phase 2 overlapping genes with the full number of reads.**

We calculated the overlap of genes with at least 10 reads passing the percent length coverage by reads ( $\geq 10\%$ ), average read mapping quality ( $\geq 11$ ) and probe mapping (except for shotgun libraries) filters.

| Samples        | Total genes | Genes found in all | Genes found in 2/3 or more | Genes found in 1/3 or more | Overlap in All Samples (%) |
|----------------|-------------|--------------------|----------------------------|----------------------------|----------------------------|
| Set 1 Enriched | 62          | 24                 | 38                         | 53                         | 38.71                      |
| Set 2 Enriched | 68          | 50                 | 57                         | 64                         | 73.53                      |
| Set 3 Enriched | 70          | 41                 | 53                         | 60                         | 58.57                      |
| All Enriched   | 70          | 24                 | 52                         | 60                         | 34.28                      |
| All Shotgun    | 32          | 16                 | 18                         | 28                         | 50.00                      |

**Supplementary Table 10: Phase 2 overlapping genes with subsampled reads.**

Libraries were subsampled to the same number of reads within sets and overall (22,324 reads). Shotgun libraries were subsampled to the same number of reads as the lowest enriched library overall. Resulting genes with at least 10 reads were filtered for percent coverage by reads ( $\geq 10\%$ ), average mapping quality ( $\geq 11$ ) and probe mapping (except for the shotgun samples).

| Samples        | Total genes | Genes found in all | Genes found in 2/3 or more | Genes found in 1/3 or more | Overlap in All Samples (%) |
|----------------|-------------|--------------------|----------------------------|----------------------------|----------------------------|
| Set 1 Enriched | 38          | 16                 | 26                         | 32                         | 42.10                      |
| Set 2 Enriched | 45          | 22                 | 30                         | 36                         | 48.89                      |
| Set 3 Enriched | 37          | 13                 | 20                         | 26                         | 35.14                      |

All Enriched  
All Shotgun

|    |    |    |    |       |
|----|----|----|----|-------|
| 47 | 13 | 24 | 31 | 27.66 |
| 2  | 0  | 1  | 2  | 0     |

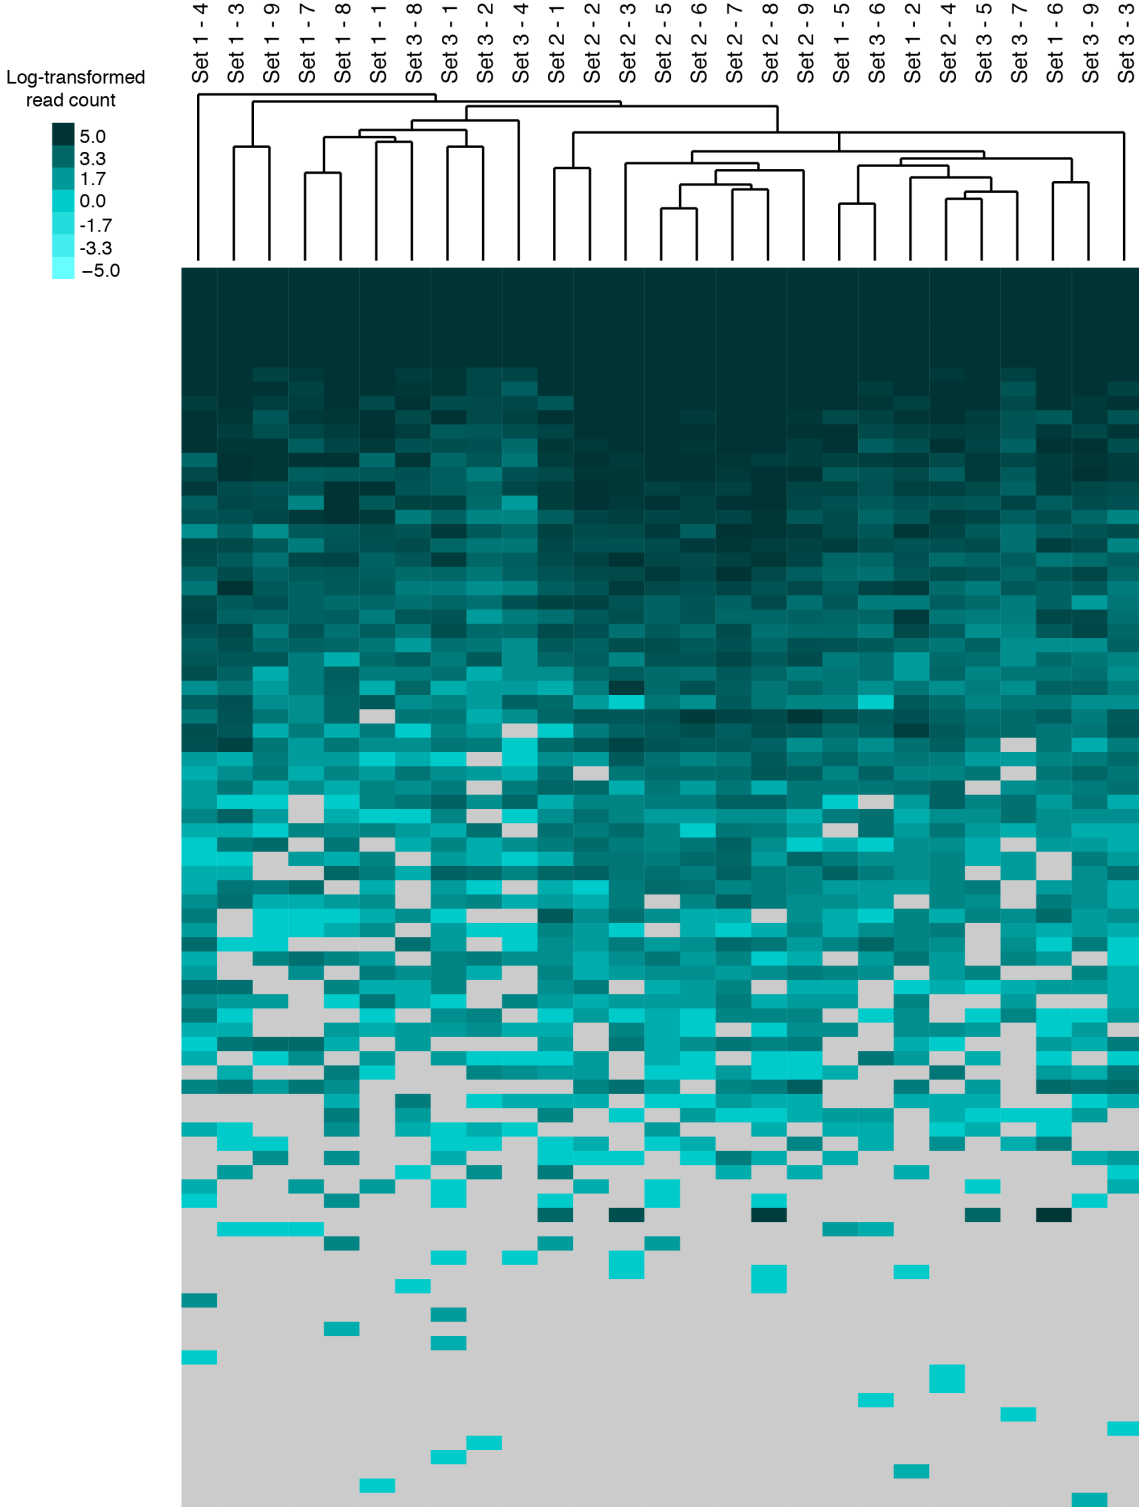

**Supplementary Figure 7: Hierarchical clustering of enriched libraries.** Enriched reads from 27 libraries were subsampled to 22,324 reads, mapped to CARD through *rgi bwt*. The reads were mapped to CARD through *rgi bwt* and filtered for genes with probes mapping, with greater than or equal to 10% length coverage by reads and an average read mapping quality  $\geq 11$ . Read counts were log-transformed and combined into a heatmap ordered by average read counts across the 27 enriched samples.



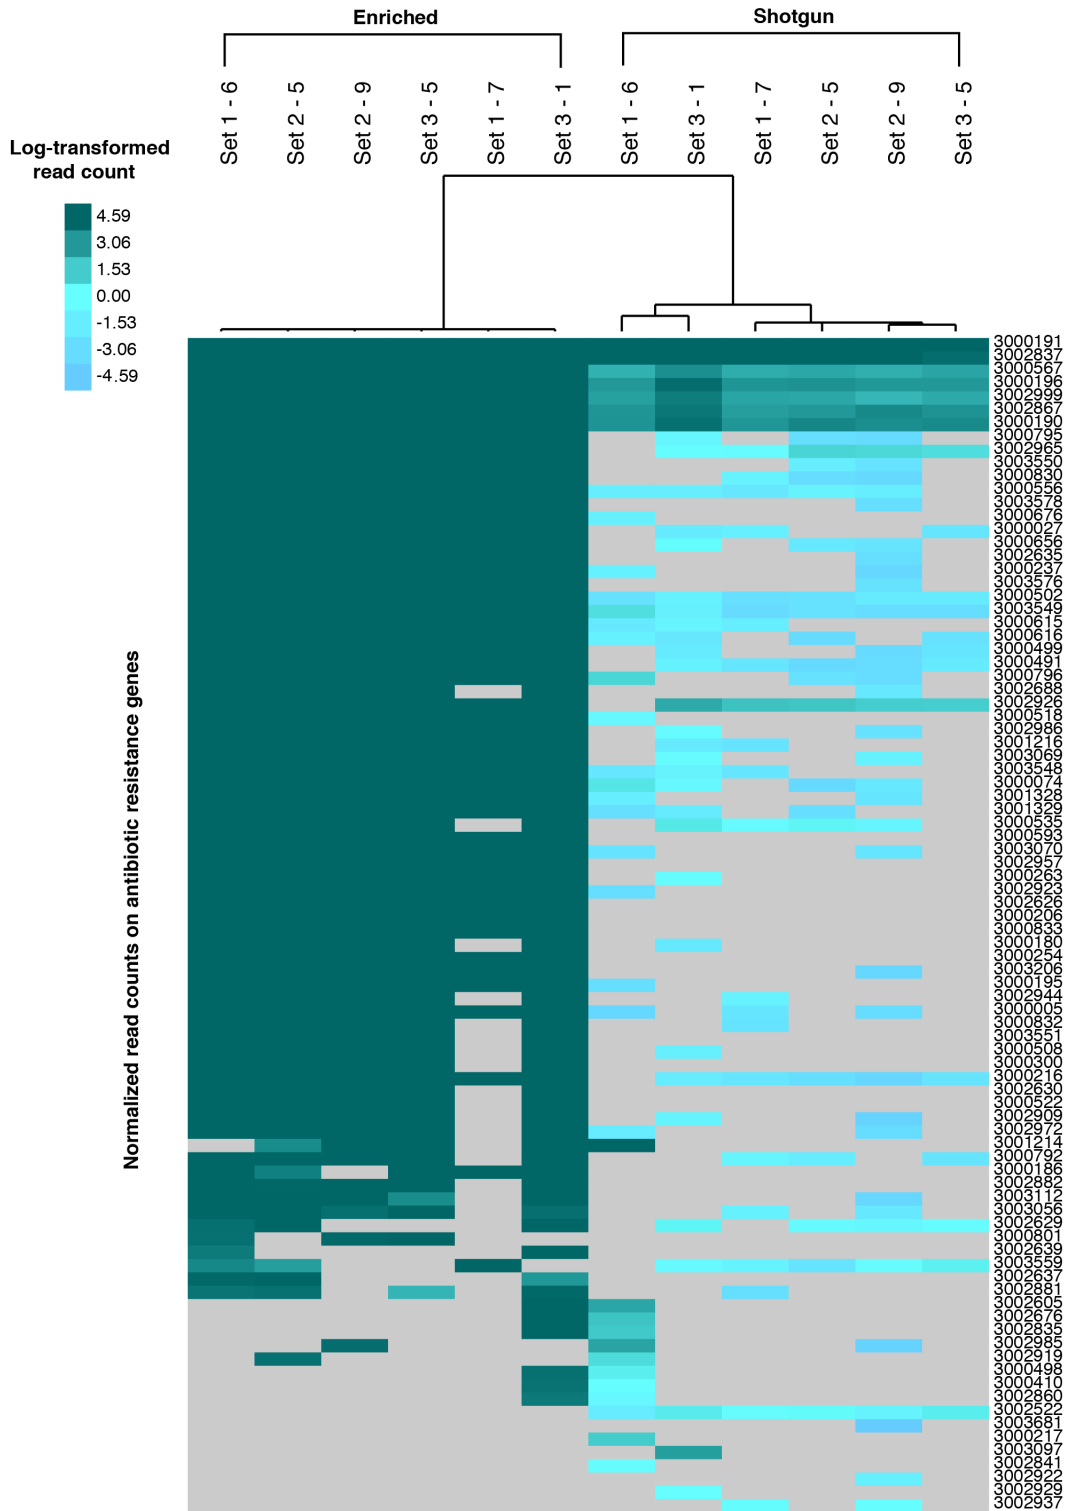

**Supplementary Figure 8: Hierarchical clustering of enriched and shotgun libraries.**

The full number of reads from the 6 enriched and shotgun pairs were mapped to CARD through *rgi bwt*. The results were filtered for genes with greater than or equal to 10% read length coverage and an average read mapping quality greater  $\geq 11$ . Read counts were normalized by kb of gene and reads available for mapping, log-transformed, and combined into a heatmap. Genes are

ordered by sum of read counts. ARO numbers from CARD are shown on the right-hand side of the heatmap.

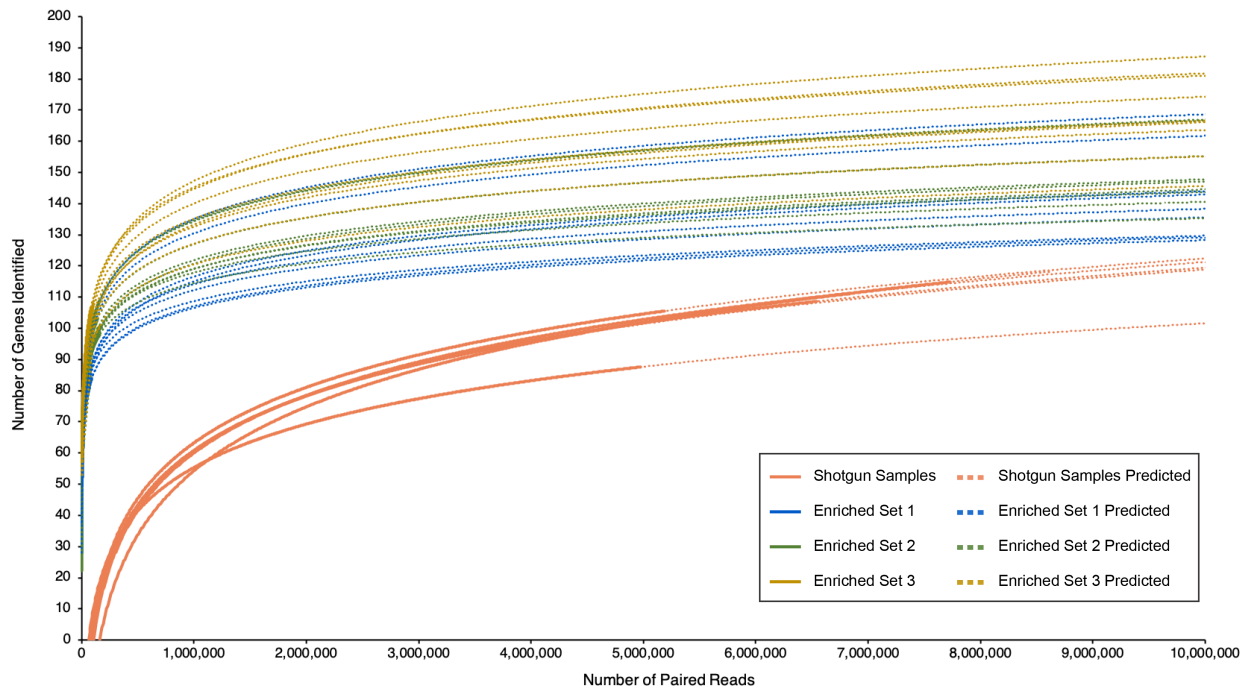

**Supplementary Figure 9: Rarefaction curves for identification of antibiotic resistance genes.** The AmrPlusPlus Rarefaction Analyzer was used with subsampling every 1% of the total reads and a gene read length of at least 10% to identify antibiotic resistance genes. The solid lines show individual sequencing experiments and the dotted lines are the logarithmic extrapolations beyond the experimental sequencing depth.

**Supplementary Table 11: Sequencing reads identified in the Blank samples.** Enriched negative control blank libraries were sequenced on separate MiSeq 2 x 250 runs. After de-multiplexing, we pulled the reads that were associated with various index combinations used alongside the Blank Negative control throughout library preparation within the same trials and sets.

| Sample        | Samples processed alongside the blank library | Number of paired reads sequenced on run with Blank | Percentage of Blank |
|---------------|-----------------------------------------------|----------------------------------------------------|---------------------|
| Blank Trial 1 | C0002                                         | 1575                                               | 0.92                |
|               | C0018                                         | 0                                                  | 0.00                |
|               | C0050                                         | 435                                                | 0.26                |
|               | C0060                                         | 379                                                | 0.22                |
|               | Pool1                                         | 3064                                               | 1.80                |
|               | Pool2                                         | 110959                                             | 65.05               |
|               | Pool3                                         | 36390                                              | 21.33               |
|               | Additional barcodes                           | 2487                                               | 1.46                |
|               | Blank                                         | 15276                                              | 8.96                |
| Blank Trial 2 | C0002                                         | 6611                                               | 15.02               |
|               | C0018                                         | 11763                                              | 26.72               |
|               | C0050                                         | 5194                                               | 11.80               |
|               | C0060                                         | 4491                                               | 10.20               |
|               | Pool1                                         | 1178                                               | 2.68                |
|               | Pool2                                         | 4800                                               | 10.90               |
|               | Pool3                                         | 5862                                               | 13.31               |
|               | Additional barcodes                           | 3044                                               | 6.91                |
|               | Blank                                         | 1083                                               | 2.46                |
| Blank Set 1   | 1 - 1                                         | 456                                                | 17.61               |
|               | 1 - 2                                         | 94                                                 | 3.63                |
|               | 1 - 3                                         | 174                                                | 6.72                |
|               | 1 - 4                                         | 101                                                | 3.90                |
|               | 1 - 5                                         | 316                                                | 12.20               |
|               | 1 - 6                                         | 82                                                 | 3.17                |
|               | 1 - 7                                         | 683                                                | 26.37               |
|               | 1 - 8                                         | 173                                                | 6.68                |
|               | 1 - 9                                         | 35                                                 | 1.35                |
|               | Negative Control - Blank                      | 28                                                 | 1.08                |
|               | C0002 - 1 - 1                                 | 120                                                | 4.63                |
|               | C0002 - 1 - 2                                 | 37                                                 | 1.43                |

|               |                          |       |       |
|---------------|--------------------------|-------|-------|
|               | C0002 – 1 - 3            | 291   | 11.24 |
| Blank Set 2   | 2 - 1                    | 367   | 9.65  |
|               | 2 - 2                    | 22    | 0.58  |
|               | 2 - 3                    | 44    | 1.16  |
|               | 2 - 4                    | 119   | 3.13  |
|               | 2 - 5                    | 40    | 1.05  |
|               | 2 - 6                    | 0     | 0.00  |
|               | 2 - 7                    | 39    | 1.03  |
|               | 2 - 8                    | 271   | 7.12  |
|               | 2 - 9                    | 137   | 3.60  |
|               | Negative Control - Blank | 530   | 13.93 |
|               | C0002 – 2 - 1            | 207   | 5.44  |
| C0002 – 2 - 2 | 34                       | 0.89  |       |
| C0002 – 2 - 3 | 1994                     | 52.42 |       |
| Blank Set 3   | 3 - 1                    | 224   | 3.76  |
|               | 3 - 2                    | 286   | 4.80  |
|               | 3 - 3                    | 71    | 1.19  |
|               | 3 - 4                    | 1653  | 27.73 |
|               | 3 - 5                    | 282   | 4.73  |
|               | 3 - 6                    | 23    | 0.39  |
|               | 3 - 7                    | 42    | 0.70  |
|               | 3 - 8                    | 128   | 2.15  |
|               | 3 - 9                    | 1198  | 20.09 |
|               | Negative Control - Blank | 0     | 0.00  |
|               | C0002 – 3 - 1            | 161   | 2.70  |
| C0002 – 3 - 2 | 817                      | 13.70 |       |
| C0002 – 3 - 3 | 1077                     | 18.06 |       |

**Supplementary Table 12: Negative control enrichment with Blank samples.** Enriched reads were divided among index combinations used during the respective Phase, Trial or Set (Supplementary Table 7). The reads belonging to each Negative Control – Blank library were trimmed and duplicates were removed then mapped to CARD through rgibwt. The number of genes with 1, at least 10 and at least 100 reads as well as genes with probes mapping, with average read mapping quality  $\geq 11$  and gene length coverage with reads  $\geq 10\%$  are shown. In Phase 2 Set 1, raw sequencing reads were used for analysis, in Set 2, deduplication was omitted, and for Set 3, there were no reads associated with the Blank indexes after sequencing.

| Sample                | Paired reads | Paired reads after trimming and de-duplication | Percent of reads mapping to CARD | Total genes with reads | Genes with 10 or more reads | Genes with 100 or more reads | Genes with at least 10 reads, $>10\%$ read coverage, MQ $\geq 11$ and probes                                                                                                                                                                                                                   |
|-----------------------|--------------|------------------------------------------------|----------------------------------|------------------------|-----------------------------|------------------------------|------------------------------------------------------------------------------------------------------------------------------------------------------------------------------------------------------------------------------------------------------------------------------------------------|
| Blank Phase 1 Trial 1 | 15276        | 2716                                           | 80.34                            | 153                    | 82                          | 9                            | 10: <i>cpxA</i> , <i>mefA</i> , <i>arlS</i> , <i>mdtO</i> , <i>mdtE</i> , <i>mdtN</i> , <i>acrD</i> , <i>armA</i> , <i>AAC(3)-IV</i> , <i>APH(7'')-Ia</i> ,                                                                                                                                    |
| Blank Phase 1 Trial 2 | 1083         | 341                                            | 97.21                            | 106                    | 9                           | 1                            | 0                                                                                                                                                                                                                                                                                              |
| Phase 2 Set 1         | 28           | N/A                                            | 0                                | 0                      | 0                           | 0                            | 0                                                                                                                                                                                                                                                                                              |
| Phase 2 Set 2*        | 530          | 412                                            | 76.46                            | 94                     | 26                          | 0                            | <b>19:</b><br><i>APH(3'')-Ib</i> , <i>acrD</i> , <i>acrE</i> , <i>acrF</i> , <i>acrS</i> , <i>cpxA</i> , <i>dfrA17</i> , <i>emrK</i> , <i>emrY</i> , <i>eptA</i> , <i>evgS</i> , <i>mdtE</i> , <i>mdtF</i> , <i>mdtH</i> , <i>mdtO</i> , <i>mdtP</i> , <i>pmrF</i> , <i>tetQ</i> , <i>tolC</i> |
| Phase 2 Set 3         | 0            | 0                                              | 0                                | 0                      | 0                           | 0                            | 0                                                                                                                                                                                                                                                                                              |

\*Genes in Set 2 Blank found in enriched and shotgun libraries: *tetQ*, *acrF*. Genes found in blank and enriched: *acrD*, *acrE*, *acrS*, *cpxA*, *emrK*, *emrY*, *eptA*, *evgS*, *mdtE*, *mdtF*, *mdtH*, *mdtO*, *mdtP*, *pmrF*, *tolC*. Genes found in blank only: *APH(3'')-Ib*, *dfrA17*,

**Supplementary Table 13: Genes identified through metagenomic analysis of enriched and shotgun samples.** Combining raw read counts across all 27 enriched and 6 shotgun sample at the full number of genes with the breakdown of gene, class and mechanisms identified. Genes were filtered based on genes with at least 10 reads mapping, percent coverage greater than or equal to 10%, mapping

quality greater than or equal to 11 and probes mapping (only for the enriched samples). This table is split into 4 parts with each part corresponding to a group of samples (Set 1, Set 2, Set 3 and the Shotgun samples). The first 6 columns are the same in all four parts.

| ARO     | Name                                                                                | Class of Resistance                                                                             | Present in Enriched | Present in Shotgun | Baits | Set 1 - 3 | Set 1 - 4 | Set 1 - 7 | Set 1 - 6 | Set 1 - 9 | Set 1 - 8 | Set 1 - 5 | Set 1 - 2 | Set 1 - 1 |
|---------|-------------------------------------------------------------------------------------|-------------------------------------------------------------------------------------------------|---------------------|--------------------|-------|-----------|-----------|-----------|-----------|-----------|-----------|-----------|-----------|-----------|
| 3000190 | <i>tetO</i>                                                                         | tetracycline antibiotic                                                                         | 27                  | 6                  | Yes   | 2240      | 2088      | 655       | 3095      | 1195      | 2459      | 2613      | 2472      | 2909      |
| 3000191 | <i>tetQ</i>                                                                         | tetracycline antibiotic                                                                         | 27                  | 6                  | Yes   | 2174      | 21337     | 7489      | 30223     | 13830     | 27383     | 22368     | 25974     | 25651     |
| 3000196 | <i>tet32</i>                                                                        | tetracycline antibiotic                                                                         | 27                  | 6                  | Yes   | 5306      | 4929      | 1610      | 7133      | 2788      | 6253      | 5760      | 5554      | 6339      |
| 3000567 | <i>tet(40)</i>                                                                      | tetracycline antibiotic                                                                         | 27                  | 6                  | Yes   | 4375      | 3252      | 978       | 5835      | 1891      | 4454      | 4654      | 3774      | 4098      |
| 3002837 | <i>lnuC</i>                                                                         | lincosamide antibiotic                                                                          | 27                  | 6                  | Yes   | 2403      | 2223      | 828       | 2740      | 1202      | 2523      | 2240      | 2590      | 2884      |
| 3002867 | <i>dfrF</i>                                                                         | diaminopyrimidine antibiotic                                                                    | 27                  | 6                  | Yes   | 1093      | 1242      | 412       | 1185      | 485       | 1126      | 1232      | 1296      | 1770      |
| 3002999 | <i>cblA-1</i>                                                                       | cephalosporin glycopeptide antibiotic                                                           | 27                  | 6                  | Yes   | 2531      | 2026      | 743       | 3297      | 1182      | 2927      | 2612      | 2258      | 2268      |
| 3002926 | <i>vanRG</i>                                                                        | antibiotic                                                                                      | 25                  | 6                  | Yes   | 16        | 15        | 0         | 39        | 0         | 20        | 24        | 10        | 22        |
| 3000194 | <i>tetW</i>                                                                         | tetracycline antibiotic; macrolide antibiotic; lincosamide antibiotic; streptogramin antibiotic | 0                   | 6                  | No    | 0         | 0         | 0         | 0         | 0         | 0         | 0         | 0         | 0         |
| 3000375 | <i>ermB</i>                                                                         | antibiotic                                                                                      | 0                   | 6                  | No    | 0         | 0         | 0         | 0         | 0         | 0         | 0         | 0         | 0         |
|         | <i>Nocardia rifampin resistant beta-subunit of RNA polymerase (rpoB2)</i>           | peptide antibiotic; rifamycin antibiotic                                                        | 0                   | 6                  | No    | 0         | 0         | 0         | 0         | 0         | 0         | 0         | 0         | 0         |
| 3000501 |                                                                                     | aminocoumarin antibiotic                                                                        | 0                   | 6                  | No    | 0         | 0         | 0         | 0         | 0         | 0         | 0         | 0         | 0         |
| 3002522 | <i>novA</i>                                                                         | antibiotic                                                                                      | 0                   | 6                  | Yes   | 0         | 0         | 0         | 0         | 0         | 0         | 0         | 0         | 0         |
| 3002597 | <i>aac(6')-Ie-aph(2'')-Ia</i>                                                       | aminoglycoside antibiotic                                                                       | 0                   | 6                  | No    | 0         | 0         | 0         | 0         | 0         | 0         | 0         | 0         | 0         |
|         | <i>Streptomyces rishiriensis parY mutant conferring resistance to aminocoumarin</i> | aminocoumarin antibiotic                                                                        | 0                   | 6                  | No    | 0         | 0         | 0         | 0         | 0         | 0         | 0         | 0         | 0         |
| 3003318 |                                                                                     | antibiotic                                                                                      | 0                   | 6                  | No    | 0         | 0         | 0         | 0         | 0         | 0         | 0         | 0         | 0         |

|         |                                                                                     |                                                                                                                         |    |   |     |    |     |    |     |    |     |     |    |     |
|---------|-------------------------------------------------------------------------------------|-------------------------------------------------------------------------------------------------------------------------|----|---|-----|----|-----|----|-----|----|-----|-----|----|-----|
| 3003730 | Bifidobacteria<br>intrinsic <i>ileS</i><br>conferring<br>resistance to<br>mupirocin | mupirocin                                                                                                               | 0  | 6 | No  | 0  | 0   | 0  | 0   | 0  | 0   | 0   | 0  | 0   |
| 3004454 | <i>Campylobacter coli</i><br>chloramphenicol<br>acetyltransferase                   | phenicol<br>antibiotic                                                                                                  | 0  | 6 | No  | 0  | 0   | 0  | 0   | 0  | 0   | 0   | 0  | 0   |
| 3002965 | <i>vanWG</i>                                                                        | glycopeptide<br>antibiotic                                                                                              | 26 | 4 | Yes | 50 | 25  | 0  | 41  | 24 | 74  | 48  | 52 | 57  |
| 3000535 | <i>macB</i>                                                                         | macrolide<br>antibiotic                                                                                                 | 22 | 4 | Yes | 26 | 0   | 0  | 107 | 0  | 43  | 56  | 0  | 29  |
| 3002647 | <i>aph(3')-IIIa</i>                                                                 | aminoglycoside<br>antibiotic                                                                                            | 0  | 3 | No  | 0  | 0   | 0  | 0   | 0  | 0   | 0   | 0  | 0   |
| 3000556 | <i>tet44</i>                                                                        | tetracycline<br>antibiotic<br>macrolide<br>antibiotic;<br>fluoroquinolone<br>antibiotic;<br>tetracycline<br>antibiotic; | 27 | 2 | Yes | 82 | 111 | 28 | 90  | 27 | 111 | 101 | 91 | 144 |
| 3003056 | <i>smeE</i>                                                                         | phenicol<br>antibiotic<br>glycopeptide                                                                                  | 8  | 2 | Yes | 16 | 0   | 0  | 13  | 0  | 10  | 0   | 0  | 0   |
| 3002937 | <i>vanSG</i>                                                                        | antibiotic<br>aminoglycoside                                                                                            | 0  | 2 | Yes | 0  | 0   | 0  | 0   | 0  | 0   | 0   | 0  | 0   |
| 3002983 | <i>amrB</i><br><i>cepA</i> beta-<br>lactamase                                       | antibiotic                                                                                                              | 0  | 2 | No  | 0  | 0   | 0  | 0   | 0  | 0   | 0   | 0  | 0   |
| 3003559 |                                                                                     | cephalosporin<br>tetracycline                                                                                           | 0  | 2 | Yes | 0  | 0   | 0  | 0   | 0  | 0   | 0   | 0  | 0   |
| 3004032 | <i>tetA(46)</i>                                                                     | antibiotic<br>tetracycline                                                                                              | 0  | 2 | No  | 0  | 0   | 0  | 0   | 0  | 0   | 0   | 0  | 0   |
| 3004033 | <i>tetB(46)</i>                                                                     | antibiotic<br>macrolide<br>antibiotic;<br>monobactam;<br>tetracycline<br>antibiotic;                                    | 0  | 2 | No  | 0  | 0   | 0  | 0   | 0  | 0   | 0   | 0  | 0   |
| 3004074 | <i>muxB</i>                                                                         | aminocoumarin<br>antibiotic                                                                                             | 0  | 2 | No  | 0  | 0   | 0  | 0   | 0  | 0   | 0   | 0  | 0   |
| 3004144 | <i>axyY</i>                                                                         | macrolide<br>antibiotic;<br>fluoroquinolone<br>antibiotic;<br>aminoglycoside                                            | 0  | 2 | No  | 0  | 0   | 0  | 0   | 0  | 0   | 0   | 0  | 0   |

|         |              |                                                                                                                                                                                                                                                                                |    |   |     |     |     |    |     |    |     |     |     |     |
|---------|--------------|--------------------------------------------------------------------------------------------------------------------------------------------------------------------------------------------------------------------------------------------------------------------------------|----|---|-----|-----|-----|----|-----|----|-----|-----|-----|-----|
|         |              | antibiotic;<br>cephalosporin                                                                                                                                                                                                                                                   |    |   |     |     |     |    |     |    |     |     |     |     |
| 3000502 | <i>acrF</i>  | fluoroquinolone<br>antibiotic;<br>cephalosporin;<br>cephamycin;<br>penam                                                                                                                                                                                                       | 27 | 1 | Yes | 190 | 107 | 28 | 181 | 51 | 140 | 141 | 127 | 130 |
| 3000793 | <i>mdtB</i>  | aminocoumarin<br>antibiotic                                                                                                                                                                                                                                                    | 0  | 1 | No  | 0   | 0   | 0  | 0   | 0  | 0   | 0   | 0   | 0   |
| 3000794 | <i>mdtC</i>  | aminocoumarin<br>antibiotic                                                                                                                                                                                                                                                    | 0  | 1 | No  | 0   | 0   | 0  | 0   | 0  | 0   | 0   | 0   | 0   |
| 3003097 | <i>cfxA6</i> | cephamycin                                                                                                                                                                                                                                                                     | 0  | 1 | Yes | 0   | 0   | 0  | 0   | 0  | 0   | 0   | 0   | 0   |
| 3000027 | <i>emrA</i>  | fluoroquinolone<br>antibiotic<br>macrolide<br>antibiotic;<br>fluoroquinolone<br>antibiotic;<br>cephalosporin;<br>glycylcycline;<br>cephamycin;<br>penam;<br>tetracycline<br>antibiotic;<br>aminocoumarin<br>antibiotic;<br>rifamycin<br>antibiotic;<br>phenicol<br>antibiotic; | 27 | 0 | Yes | 49  | 51  | 20 | 40  | 26 | 51  | 39  | 37  | 38  |
| 3000237 | <i>tolC</i>  | triclosan<br>aminoglycoside                                                                                                                                                                                                                                                    | 27 | 0 | Yes | 39  | 36  | 28 | 57  | 26 | 102 | 53  | 53  | 94  |
| 3000491 | <i>acrD</i>  | antibiotic<br>macrolide                                                                                                                                                                                                                                                        | 27 | 0 | Yes | 83  | 66  | 24 | 173 | 36 | 111 | 143 | 83  | 88  |
| 3000615 | <i>mefA</i>  | antibiotic<br>macrolide<br>antibiotic;                                                                                                                                                                                                                                         | 27 | 0 | Yes | 57  | 27  | 13 | 55  | 27 | 68  | 33  | 36  | 43  |
| 3000616 | <i>mel</i>   | streptogramin<br>antibiotic<br>macrolide<br>antibiotic;                                                                                                                                                                                                                        | 27 | 0 | Yes | 28  | 11  | 13 | 50  | 11 | 36  | 53  | 69  | 73  |
| 3000795 | <i>mdtE</i>  | fluoroquinolone<br>antibiotic;<br>penam                                                                                                                                                                                                                                        | 27 | 0 | Yes | 92  | 64  | 12 | 173 | 38 | 78  | 125 | 56  | 96  |



|         |                              |                                                                                                                       |    |   |     |     |     |    |     |    |     |     |     |     |
|---------|------------------------------|-----------------------------------------------------------------------------------------------------------------------|----|---|-----|-----|-----|----|-----|----|-----|-----|-----|-----|
| 3000796 | <i>mdtF</i>                  | macrolide<br>antibiotic;<br>fluoroquinolone<br>antibiotic;<br>penam<br>aminoglycoside<br>antibiotic;<br>aminocoumarin | 27 | 0 | Yes | 144 | 102 | 22 | 223 | 76 | 110 | 94  | 102 | 131 |
| 3000830 | <i>cpxA</i>                  | antibiotic<br>macrolide<br>antibiotic;<br>fluoroquinolone<br>antibiotic;<br>penam;                                    | 27 | 0 | Yes | 93  | 40  | 12 | 97  | 49 | 56  | 66  | 54  | 49  |
| 3000833 | <i>evgS</i>                  | tetracycline<br>antibiotic<br>fluoroquinolone                                                                         | 27 | 0 | Yes | 46  | 55  | 11 | 49  | 28 | 42  | 27  | 18  | 19  |
| 3001216 | <i>mdtH</i>                  | antibiotic<br>tetracycline<br>antibiotic;                                                                             | 27 | 0 | Yes | 23  | 55  | 11 | 73  | 19 | 35  | 35  | 66  | 23  |
| 3001328 | <i>Escherichia coli mdfA</i> | benzalkonium<br>chloride;<br>rhodamine<br>nucleoside<br>antibiotic;                                                   | 27 | 0 | Yes | 44  | 28  | 11 | 22  | 17 | 42  | 37  | 19  | 32  |
| 3003549 | <i>mdtO</i>                  | acridine dye<br>nucleoside<br>antibiotic;                                                                             | 27 | 0 | Yes | 75  | 91  | 20 | 104 | 36 | 93  | 112 | 79  | 118 |
| 3003550 | <i>mdtP</i>                  | acridine dye<br>peptide                                                                                               | 27 | 0 | Yes | 73  | 44  | 34 | 118 | 53 | 83  | 74  | 74  | 57  |
| 3003576 | <i>eptA</i>                  | antibiotic<br>peptide                                                                                                 | 27 | 0 | Yes | 59  | 76  | 16 | 112 | 30 | 65  | 65  | 68  | 91  |
| 3003578 | <i>pmrF</i>                  | antibiotic<br>fluoroquinolone                                                                                         | 27 | 0 | Yes | 68  | 25  | 11 | 71  | 30 | 42  | 46  | 53  | 47  |
| 3000074 | <i>emrB</i>                  | antibiotic<br>fluoroquinolone<br>antibiotic;                                                                          | 26 | 0 | Yes | 42  | 15  | 0  | 36  | 15 | 29  | 48  | 43  | 19  |
| 3000499 | <i>acrE</i>                  | cephalosporin;<br>cephamycin;<br>penam<br>macrolide<br>antibiotic;<br>fluoroquinolone<br>antibiotic;                  | 26 | 0 | Yes | 68  | 37  | 0  | 76  | 24 | 40  | 66  | 56  | 48  |
| 3000518 | <i>crp</i>                   | penam                                                                                                                 | 26 | 0 | Yes | 31  | 10  | 0  | 47  | 17 | 28  | 21  | 16  | 10  |

|         |                     |                                                                                                                                                                                                |    |   |     |    |    |    |    |    |    |    |    |    |
|---------|---------------------|------------------------------------------------------------------------------------------------------------------------------------------------------------------------------------------------|----|---|-----|----|----|----|----|----|----|----|----|----|
| 3000656 | <i>acrS</i>         | fluoroquinolone<br>antibiotic;<br>cephalosporin;<br>glycylcycline;<br>cephamycin;<br>penam;<br>tetracycline<br>antibiotic;<br>rifamycin<br>antibiotic;<br>phenicol<br>antibiotic;<br>triclosan | 26 | 0 | Yes | 23 | 28 | 0  | 36 | 26 | 18 | 16 | 11 | 37 |
| 3002635 | <i>aph(2'')-IIa</i> | aminoglycoside<br>antibiotic<br>nucleoside<br>antibiotic;                                                                                                                                      | 26 | 0 | Yes | 59 | 31 | 15 | 65 | 0  | 35 | 29 | 51 | 46 |
| 3003548 | <i>mdtN</i>         | acridine dye<br>tetracycline                                                                                                                                                                   | 26 | 0 | Yes | 57 | 40 | 0  | 33 | 15 | 18 | 24 | 17 | 11 |
| 3000254 | <i>emrY</i>         | antibiotic                                                                                                                                                                                     | 25 | 0 | Yes | 40 | 17 | 0  | 25 | 18 | 26 | 14 | 38 | 37 |
| 3001329 | <i>mdtG</i>         | fosfomycin<br>peptide                                                                                                                                                                          | 25 | 0 | Yes | 24 | 38 | 0  | 36 | 0  | 12 | 30 | 60 | 12 |
| 3002986 | <i>bacA</i>         | antibiotic<br>fluoroquinolone<br>antibiotic;<br>cephalosporin;<br>glycylcycline;<br>penam;<br>tetracycline<br>antibiotic;<br>rifamycin<br>antibiotic;<br>phenicol<br>antibiotic;               | 25 | 0 | Yes | 27 | 33 | 0  | 35 | 0  | 42 | 20 | 15 | 17 |
| 3000216 | <i>acrB</i>         | triclosan<br>phenicol                                                                                                                                                                          | 24 | 0 | Yes | 13 | 13 | 0  | 35 | 0  | 25 | 14 | 16 | 0  |
| 3002688 | <i>catS</i>         | antibiotic<br>tetracycline                                                                                                                                                                     | 24 | 0 | Yes | 0  | 13 | 0  | 14 | 0  | 25 | 24 | 14 | 21 |
| 3000195 | <i>tetB(P)</i>      | antibiotic<br>lincosamide<br>antibiotic;<br>streptogramin<br>antibiotic;                                                                                                                       | 23 | 0 | Yes | 15 | 0  | 0  | 15 | 0  | 0  | 19 | 19 | 15 |
| 3000300 | <i>lsaA</i>         | pleuromutilin<br>antibiotic                                                                                                                                                                    | 22 | 0 | Yes | 22 | 0  | 0  | 0  | 14 | 17 | 11 | 12 | 13 |

|         |                  |                                                                                                                                     |    |   |     |    |    |   |    |    |    |    |    |    |
|---------|------------------|-------------------------------------------------------------------------------------------------------------------------------------|----|---|-----|----|----|---|----|----|----|----|----|----|
| 3000676 | <i>H-NS</i>      | macrolide<br>antibiotic;<br>fluoroquinolone<br>antibiotic;<br>cephalosporin;<br>cephamycin;<br>penam;<br>tetracycline<br>antibiotic | 22 | 0 | Yes | 0  | 0  | 0 | 18 | 0  | 11 | 19 | 18 | 0  |
| 3003070 | <i>vanXD</i>     | glycopeptide<br>antibiotic                                                                                                          | 22 | 0 | Yes | 25 | 19 | 0 | 22 | 0  | 0  | 19 | 0  | 0  |
| 3000180 | <i>tetA(P)</i>   | tetracycline<br>antibiotic                                                                                                          | 21 | 0 | Yes | 15 | 15 | 0 | 0  | 0  | 0  | 0  | 12 | 31 |
| 3000593 | <i>ermQ</i>      | macrolide<br>antibiotic;<br>lincosamide<br>antibiotic;<br>streptogramin<br>antibiotic                                               | 21 | 0 | Yes | 0  | 0  | 0 | 10 | 0  | 12 | 0  | 23 | 15 |
| 3002626 | <i>ant(6)-Ia</i> | aminoglycoside<br>antibiotic                                                                                                        | 21 | 0 | Yes | 17 | 0  | 0 | 0  | 11 | 0  | 0  | 11 | 0  |
| 3003069 | <i>vanXYG</i>    | glycopeptide<br>antibiotic                                                                                                          | 21 | 0 | Yes | 27 | 0  | 0 | 13 | 0  | 0  | 12 | 0  | 0  |
| 3003206 | <i>IsaE</i>      | lincosamide<br>antibiotic;<br>pleuromutilin<br>antibiotic                                                                           | 21 | 0 | Yes | 13 | 0  | 0 | 15 | 0  | 16 | 0  | 0  | 31 |
| 3000206 | <i>emrK</i>      | tetracycline<br>antibiotic                                                                                                          | 20 | 0 | Yes | 0  | 0  | 0 | 0  | 0  | 14 | 12 | 0  | 13 |
| 3003551 | <i>emeA</i>      | acridine dye<br>antibiotic                                                                                                          | 20 | 0 | Yes | 0  | 22 | 0 | 0  | 0  | 0  | 13 | 16 | 0  |
| 3002923 | <i>vanRD</i>     | glycopeptide<br>antibiotic                                                                                                          | 19 | 0 | Yes | 0  | 0  | 0 | 0  | 0  | 0  | 13 | 0  | 13 |
| 3002944 | <i>vanHD</i>     | glycopeptide<br>antibiotic                                                                                                          | 19 | 0 | Yes | 15 | 0  | 0 | 17 | 0  | 0  | 12 | 0  | 0  |
| 3000005 | <i>vanD</i>      | glycopeptide<br>antibiotic                                                                                                          | 18 | 0 | Yes | 0  | 15 | 0 | 28 | 0  | 0  | 0  | 12 | 0  |
| 3000522 | <i>ermG</i>      | macrolide<br>antibiotic;<br>lincosamide<br>antibiotic;<br>streptogramin<br>antibiotic                                               | 17 | 0 | Yes | 29 | 15 | 0 | 11 | 0  | 0  | 10 | 0  | 10 |

|         |                  |                                                                                                                                                                                                                                                                                                                                              |    |   |     |   |    |   |    |   |    |   |    |    |
|---------|------------------|----------------------------------------------------------------------------------------------------------------------------------------------------------------------------------------------------------------------------------------------------------------------------------------------------------------------------------------------|----|---|-----|---|----|---|----|---|----|---|----|----|
| 3000263 | <i>marA</i>      | fluoroquinolone<br>antibiotic;<br>monobactam;<br>carbapenem;<br>cephalosporin;<br>glycylcycline;<br>cephamycin;<br>penam;<br>tetracycline<br>antibiotic;<br>rifamycin<br>antibiotic;<br>phenicol<br>antibiotic;<br>triclosan;<br>penem<br>macrolide<br>antibiotic;<br>fluoroquinolone<br>antibiotic;<br>penam;<br>tetracycline<br>antibiotic | 14 | 0 | Yes | 0 | 0  | 0 | 0  | 0 | 0  | 0 | 10 | 10 |
| 3000832 | <i>evgA</i>      | glycopeptide<br>antibiotic                                                                                                                                                                                                                                                                                                                   | 14 | 0 | Yes | 0 | 15 | 0 | 0  | 0 | 0  | 0 | 0  | 0  |
| 3002972 | <i>vanTG</i>     | aminoglycoside<br>antibiotic                                                                                                                                                                                                                                                                                                                 | 14 | 0 | Yes | 0 | 0  | 0 | 0  | 0 | 0  | 0 | 10 | 14 |
| 3002630 | <i>ant(9)-Ia</i> | macrolide<br>antibiotic                                                                                                                                                                                                                                                                                                                      | 12 | 0 | Yes | 0 | 0  | 0 | 0  | 0 | 0  | 0 | 15 | 0  |
| 3000508 | <i>gadX</i>      | fluoroquinolone<br>antibiotic;<br>penam<br>lincosamide                                                                                                                                                                                                                                                                                       | 11 | 0 | Yes | 0 | 0  | 0 | 21 | 0 | 0  | 0 | 0  | 0  |
| 3002882 | <i>lmrD</i>      | antibiotic                                                                                                                                                                                                                                                                                                                                   | 10 | 0 | Yes | 0 | 0  | 0 | 0  | 0 | 16 | 0 | 0  | 0  |
| 3002957 | <i>vanYD</i>     | glycopeptide<br>antibiotic<br>fluoroquinolone<br>antibiotic;                                                                                                                                                                                                                                                                                 | 10 | 0 | Yes | 0 | 0  | 0 | 0  | 0 | 0  | 0 | 10 | 14 |
| 3001214 | <i>mdtM</i>      | lincosamide<br>antibiotic;<br>nucleoside<br>antibiotic;<br>acridine dye;<br>phenicol<br>antibiotic                                                                                                                                                                                                                                           | 7  | 0 | Yes | 0 | 0  | 0 | 0  | 0 | 0  | 0 | 0  | 0  |
| 3002909 | <i>vanG</i>      | glycopeptide<br>antibiotic                                                                                                                                                                                                                                                                                                                   | 6  | 0 | Yes | 0 | 0  | 0 | 0  | 0 | 0  | 0 | 0  | 0  |

| 3003112 | <i>lsaC</i>      | lincosamide<br>antibiotic;<br>streptogramin<br>antibiotic;<br>pleuromutilin<br>antibiotic                                                                                                                            | 6                         | 0                        | Yes   | 0            | 0            | 0            | 0            | 0            | 0            | 0         | 0            | 0            |
|---------|------------------|----------------------------------------------------------------------------------------------------------------------------------------------------------------------------------------------------------------------|---------------------------|--------------------------|-------|--------------|--------------|--------------|--------------|--------------|--------------|-----------|--------------|--------------|
| 3002881 | <i>lmrC</i>      | lincosamide<br>antibiotic                                                                                                                                                                                            | 4                         | 0                        | Yes   | 0            | 0            | 0            | 0            | 0            | 0            | 0         | 0            | 0            |
| 3000792 | <i>mdtA</i>      | aminocoumarin<br>antibiotic                                                                                                                                                                                          | 3                         | 0                        | Yes   | 10           | 0            | 0            | 0            | 0            | 0            | 0         | 0            | 0            |
| 3000186 | <i>tetM</i>      | tetracycline<br>antibiotic<br>macrolide<br>antibiotic;<br>fluoroquinolone<br>antibiotic;<br>aminoglycoside<br>antibiotic;<br>cephalosporin;<br>penam;<br>tetracycline<br>antibiotic;<br>aminocoumarin<br>antibiotic; | 2                         | 0                        | Yes   | 0            | 0            | 0            | 0            | 0            | 0            | 0         | 0            | 0            |
| 3000801 | <i>mexD</i>      | diaminopyrimid<br>ine antibiotic;<br>phenicol<br>antibiotic<br>aminoglycoside<br>antibiotic;<br>cephalosporin;<br>cephamycin;<br>penam<br>aminoglycoside<br>antibiotic                                               | 2                         | 0                        | Yes   | 0            | 0            | 0            | 0            | 0            | 0            | 0         | 0            | 0            |
| 3003052 | <i>smeB</i>      | aminoglycoside<br>antibiotic;<br>cephalosporin;<br>cephamycin;<br>penam<br>aminoglycoside<br>antibiotic                                                                                                              | 2                         | 0                        | Yes   | 0            | 0            | 0            | 0            | 0            | 0            | 0         | 0            | 0            |
| 3002629 | <i>ant(6)-Ib</i> | antibiotic                                                                                                                                                                                                           | 1                         | 0                        | Yes   | 0            | 0            | 0            | 0            | 0            | 0            | 0         | 0            | 0            |
| ARO     | Name             | Class of<br>Resistance                                                                                                                                                                                               | Present<br>in<br>Enriched | Present<br>in<br>Shotgun | Baits | Set 2<br>- 9 | Set 2 -<br>3 | Set 2 -<br>2 | Set 2 -<br>6 | Set 2 -<br>5 | Set 2 -<br>1 | Set 2 - 4 | Set 2 -<br>8 | Set 2 -<br>7 |
| 3000190 | <i>tetO</i>      | tetracycline<br>antibiotic                                                                                                                                                                                           | 27                        | 6                        | Yes   | 3478<br>2267 | 4231         | 4417         | 6684         | 6400         | 5670         | 5324      | 6567         | 4717         |
| 3000191 | <i>tetQ</i>      | tetracycline<br>antibiotic                                                                                                                                                                                           | 27                        | 6                        | Yes   | 4            | 32260        | 29099        | 46576        | 50381        | 46810        | 31557     | 36461        | 28754        |
| 3000196 | <i>tet32</i>     | tetracycline<br>antibiotic                                                                                                                                                                                           | 27                        | 6                        | Yes   | 6678         | 8515         | 8709         | 12551        | 12546        | 11884        | 9807      | 11034        | 9021         |
| 3000567 | <i>tet(40)</i>   | tetracycline<br>antibiotic                                                                                                                                                                                           | 27                        | 6                        | Yes   | 5956         | 7154         | 6153         | 10967        | 9134         | 7174         | 7321      | 9325         | 7143         |
| 3002837 | <i>lnuC</i>      | lincosamide<br>antibiotic                                                                                                                                                                                            | 27                        | 6                        | Yes   | 2443         | 3407         | 3560         | 4857         | 5135         | 5372         | 3895      | 4083         | 3376         |
| 3002867 | <i>dfrF</i>      | diaminopyrimid<br>ine antibiotic                                                                                                                                                                                     | 27                        | 6                        | Yes   | 1286         | 1855         | 2000         | 2435         | 2620         | 3186         | 2469      | 2272         | 1916         |

|         |                                                                                                                      |                                                   |    |   |     |      |      |      |      |      |      |      |      |      |
|---------|----------------------------------------------------------------------------------------------------------------------|---------------------------------------------------|----|---|-----|------|------|------|------|------|------|------|------|------|
| 3002999 | <i>cblA-1</i>                                                                                                        | cephalosporin glycopeptide                        | 27 | 6 | Yes | 2970 | 3701 | 3263 | 5479 | 4788 | 4264 | 3771 | 4510 | 3451 |
| 3002926 | <i>vanRG</i>                                                                                                         | antibiotic tetracycline                           | 25 | 6 | Yes | 52   | 44   | 17   | 74   | 63   | 56   | 41   | 78   | 43   |
| 3000194 | <i>tetW</i>                                                                                                          | antibiotic macrolide                              | 0  | 6 | No  | 0    | 0    | 0    | 0    | 0    | 0    | 0    | 0    | 0    |
| 3000375 | <i>ermB</i><br>Nocardia rifampin resistant beta-subunit of RNA polymerase                                            | antibiotic; lincosamide; streptogramin antibiotic | 0  | 6 | No  | 0    | 0    | 0    | 0    | 0    | 0    | 0    | 0    | 0    |
| 3000501 | <i>(rpoB2)</i>                                                                                                       | peptide antibiotic; rifamycin                     | 0  | 6 | No  | 0    | 0    | 0    | 0    | 0    | 0    | 0    | 0    | 0    |
| 3002522 | <i>novA</i>                                                                                                          | aminocoumarin antibiotic                          | 0  | 6 | Yes | 0    | 0    | 0    | 0    | 0    | 0    | 0    | 0    | 0    |
| 3002597 | <i>aac(6')-Ie-aph(2'')-Ia</i><br>Streptomyces rishiriensis <i>parY</i> mutant conferring resistance to aminocoumarin | aminoglycoside antibiotic                         | 0  | 6 | No  | 0    | 0    | 0    | 0    | 0    | 0    | 0    | 0    | 0    |
| 3003318 | Bifidobacteria intrinsic <i>ileS</i> conferring resistance to mupirocin                                              | aminocoumarin antibiotic                          | 0  | 6 | No  | 0    | 0    | 0    | 0    | 0    | 0    | 0    | 0    | 0    |
| 3003730 | <i>Campylobacter coli</i> chloramphenicol acetyltransferase                                                          | mupirocin                                         | 0  | 6 | No  | 0    | 0    | 0    | 0    | 0    | 0    | 0    | 0    | 0    |
| 3004454 |                                                                                                                      | phenicol antibiotic glycopeptide                  | 0  | 6 | No  | 0    | 0    | 0    | 0    | 0    | 0    | 0    | 0    | 0    |
| 3002965 | <i>vanWG</i>                                                                                                         | antibiotic macrolide                              | 26 | 4 | Yes | 86   | 121  | 91   | 193  | 184  | 120  | 109  | 178  | 135  |
| 3000535 | <i>macB</i>                                                                                                          | antibiotic aminoglycoside                         | 22 | 4 | Yes | 106  | 84   | 62   | 167  | 95   | 66   | 65   | 96   | 75   |
| 3002647 | <i>aph(3')-IIIa</i>                                                                                                  | antibiotic tetracycline                           | 0  | 3 | No  | 0    | 0    | 0    | 0    | 0    | 0    | 0    | 0    | 0    |
| 3000556 | <i>tet44</i>                                                                                                         | antibiotic macrolide                              | 27 | 2 | Yes | 115  | 172  | 200  | 252  | 283  | 279  | 271  | 277  | 210  |
| 3003056 | <i>smeE</i>                                                                                                          | antibiotic;                                       | 8  | 2 | Yes | 0    | 18   | 0    | 22   | 15   | 0    | 0    | 16   | 0    |

|         |                                |                                                                                                                            |    |   |     |     |     |     |     |     |     |     |     |     |
|---------|--------------------------------|----------------------------------------------------------------------------------------------------------------------------|----|---|-----|-----|-----|-----|-----|-----|-----|-----|-----|-----|
| 3002937 | <i>vanSG</i>                   | fluoroquinolone<br>antibiotic;<br>tetracycline<br>antibiotic;<br>phenicol<br>antibiotic<br>glycopeptide<br>antibiotic      | 0  | 2 | Yes | 0   | 0   | 0   | 0   | 0   | 0   | 0   | 0   |     |
| 3002983 | <i>amrB</i>                    | aminoglycoside<br>antibiotic                                                                                               | 0  | 2 | No  | 0   | 0   | 0   | 0   | 0   | 0   | 0   | 0   |     |
| 3003559 | <i>cepA</i> beta-<br>lactamase | cephalosporin<br>tetracycline<br>antibiotic                                                                                | 0  | 2 | Yes | 0   | 0   | 0   | 0   | 0   | 0   | 0   | 0   |     |
| 3004032 | <i>tetA(46)</i>                | tetracycline<br>antibiotic                                                                                                 | 0  | 2 | No  | 0   | 0   | 0   | 0   | 0   | 0   | 0   | 0   |     |
| 3004033 | <i>tetB(46)</i>                | tetracycline<br>antibiotic<br>macrolide<br>antibiotic;<br>monobactam;<br>tetracycline<br>antibiotic;                       | 0  | 2 | No  | 0   | 0   | 0   | 0   | 0   | 0   | 0   | 0   |     |
| 3004074 | <i>muxB</i>                    | aminocoumarin<br>antibiotic<br>macrolide<br>antibiotic;<br>fluoroquinolone<br>antibiotic;<br>aminoglycoside<br>antibiotic; | 0  | 2 | No  | 0   | 0   | 0   | 0   | 0   | 0   | 0   | 0   |     |
| 3004144 | <i>axyY</i>                    | cephalosporin<br>fluoroquinolone<br>antibiotic;<br>cephalosporin;<br>cephamycin;                                           | 0  | 2 | No  | 0   | 0   | 0   | 0   | 0   | 0   | 0   | 0   |     |
| 3000502 | <i>acrF</i>                    | penam<br>aminocoumarin<br>antibiotic                                                                                       | 27 | 1 | Yes | 229 | 310 | 209 | 466 | 377 | 290 | 218 | 407 | 221 |
| 3000793 | <i>mdtB</i>                    | aminocoumarin<br>antibiotic                                                                                                | 0  | 1 | No  | 0   | 0   | 0   | 0   | 0   | 0   | 0   | 0   |     |
| 3000794 | <i>mdtC</i>                    | aminocoumarin<br>antibiotic                                                                                                | 0  | 1 | No  | 0   | 0   | 0   | 0   | 0   | 0   | 0   | 0   |     |
| 3003097 | <i>cfxA6</i>                   | cephamycin<br>fluoroquinolone<br>antibiotic                                                                                | 0  | 1 | Yes | 0   | 0   | 0   | 0   | 0   | 0   | 0   | 0   |     |
| 3000027 | <i>emrA</i>                    | macrolide<br>antibiotic;<br>fluoroquinolone<br>antibiotic;<br>cephalosporin;<br>glycylcycline;<br>cephamycin;              | 27 | 0 | Yes | 94  | 119 | 98  | 139 | 123 | 91  | 98  | 149 | 121 |
| 3000237 | <i>tolC</i>                    | penam;                                                                                                                     | 27 | 0 | Yes | 75  | 100 | 102 | 186 | 142 | 113 | 127 | 158 | 69  |

|         |                              |                                                                                                                                                                 |    |   |     |     |     |     |     |     |     |     |     |     |
|---------|------------------------------|-----------------------------------------------------------------------------------------------------------------------------------------------------------------|----|---|-----|-----|-----|-----|-----|-----|-----|-----|-----|-----|
| 3000491 | <i>acrD</i>                  | tetracycline<br>antibiotic;<br>aminocoumarin<br>antibiotic;<br>rifamycin<br>antibiotic;<br>phenicol<br>antibiotic;<br>triclosan<br>aminoglycoside<br>antibiotic | 27 | 0 | Yes | 186 | 217 | 170 | 398 | 281 | 111 | 180 | 337 | 192 |
| 3000615 | <i>mefA</i>                  | macrolide<br>antibiotic                                                                                                                                         | 27 | 0 | Yes | 82  | 75  | 92  | 134 | 168 | 100 | 107 | 114 | 118 |
| 3000616 | <i>mel</i>                   | macrolide<br>antibiotic;<br>streptogramin<br>antibiotic                                                                                                         | 27 | 0 | Yes | 93  | 60  | 80  | 163 | 166 | 168 | 139 | 162 | 162 |
| 3000795 | <i>mdtE</i>                  | macrolide<br>antibiotic;<br>fluoroquinolone<br>antibiotic;<br>penam                                                                                             | 27 | 0 | Yes | 127 | 176 | 127 | 293 | 271 | 148 | 199 | 228 | 134 |
| 3000796 | <i>mdtF</i>                  | macrolide<br>antibiotic;<br>fluoroquinolone<br>antibiotic;<br>penam                                                                                             | 27 | 0 | Yes | 208 | 267 | 163 | 455 | 292 | 190 | 254 | 350 | 181 |
| 3000830 | <i>cpxA</i>                  | aminoglycoside<br>antibiotic;<br>aminocoumarin<br>antibiotic                                                                                                    | 27 | 0 | Yes | 135 | 147 | 112 | 290 | 215 | 132 | 96  | 215 | 140 |
| 3000833 | <i>evgS</i>                  | macrolide<br>antibiotic;<br>fluoroquinolone<br>antibiotic;<br>penam;                                                                                            | 27 | 0 | Yes | 43  | 62  | 88  | 120 | 130 | 126 | 76  | 116 | 53  |
| 3001216 | <i>mdtH</i>                  | tetracycline<br>antibiotic                                                                                                                                      | 27 | 0 | Yes | 52  | 69  | 74  | 137 | 86  | 63  | 62  | 67  | 43  |
| 3001328 | <i>Escherichia coli mdfA</i> | tetracycline<br>antibiotic;<br>benzalkonium<br>chloride;<br>rhodamine<br>nucleoside<br>antibiotic;                                                              | 27 | 0 | Yes | 49  | 98  | 51  | 100 | 44  | 77  | 60  | 105 | 66  |
| 3003549 | <i>mdtO</i>                  | acridine dye                                                                                                                                                    | 27 | 0 | Yes | 129 | 197 | 164 | 290 | 262 | 119 | 145 | 241 | 162 |



|         |                     |                                                                                                                          |    |   |     |     |     |     |     |     |     |     |     |     |
|---------|---------------------|--------------------------------------------------------------------------------------------------------------------------|----|---|-----|-----|-----|-----|-----|-----|-----|-----|-----|-----|
| 3003550 | <i>mdtP</i>         | nucleoside<br>antibiotic;<br>acridine dye                                                                                | 27 | 0 | Yes | 135 | 140 | 116 | 252 | 266 | 136 | 102 | 192 | 154 |
| 3003576 | <i>eptA</i>         | peptide<br>antibiotic                                                                                                    | 27 | 0 | Yes | 121 | 121 | 109 | 234 | 171 | 139 | 111 | 208 | 91  |
| 3003578 | <i>pmrF</i>         | peptide<br>antibiotic                                                                                                    | 27 | 0 | Yes | 89  | 128 | 82  | 182 | 151 | 77  | 89  | 151 | 95  |
| 3000074 | <i>emrB</i>         | fluoroquinolone<br>antibiotic                                                                                            | 26 | 0 | Yes | 86  | 80  | 49  | 151 | 88  | 76  | 50  | 127 | 70  |
| 3000499 | <i>acrE</i>         | fluoroquinolone<br>antibiotic;<br>cephalosporin;<br>cephamycin;<br>penam                                                 | 26 | 0 | Yes | 90  | 107 | 76  | 178 | 102 | 151 | 82  | 149 | 82  |
| 3000518 | <i>crp</i>          | macrolide<br>antibiotic;<br>fluoroquinolone<br>antibiotic;<br>penam                                                      | 26 | 0 | Yes | 36  | 80  | 35  | 90  | 48  | 54  | 47  | 54  | 29  |
| 3000656 | <i>acrS</i>         | fluoroquinolone<br>antibiotic;<br>cephalosporin;<br>glycylcycline;<br>cephamycin;<br>penam;                              | 26 | 0 | Yes | 67  | 52  | 52  | 101 | 83  | 62  | 44  | 93  | 78  |
| 3002635 | <i>aph(2'')-IIa</i> | tetracycline<br>antibiotic;<br>aminoglycoside                                                                            | 26 | 0 | Yes | 50  | 43  | 69  | 84  | 102 | 97  | 138 | 90  | 93  |
| 3003548 | <i>mdtN</i>         | nucleoside<br>antibiotic;<br>acridine dye                                                                                | 26 | 0 | Yes | 43  | 76  | 47  | 105 | 85  | 41  | 57  | 81  | 25  |
| 3000254 | <i>emrY</i>         | tetracycline<br>antibiotic                                                                                               | 25 | 0 | Yes | 28  | 11  | 23  | 71  | 31  | 49  | 33  | 61  | 44  |
| 3001329 | <i>mdtG</i>         | fosfomycin                                                                                                               | 25 | 0 | Yes | 42  | 47  | 44  | 97  | 94  | 28  | 74  | 113 | 44  |
| 3002986 | <i>bacA</i>         | peptide<br>antibiotic                                                                                                    | 25 | 0 | Yes | 40  | 48  | 30  | 70  | 65  | 15  | 44  | 51  | 42  |
| 3000216 | <i>acrB</i>         | fluoroquinolone<br>antibiotic;<br>cephalosporin;<br>glycylcycline;<br>penam;<br>tetracycline<br>antibiotic;<br>rifamycin | 24 | 0 | Yes | 45  | 40  | 28  | 61  | 36  | 17  | 22  | 34  | 22  |

|         |                  |                                                                                                                                     |    |   |     |    |    |    |    |    |    |    |    |    |
|---------|------------------|-------------------------------------------------------------------------------------------------------------------------------------|----|---|-----|----|----|----|----|----|----|----|----|----|
| 3002688 | <i>catS</i>      | antibiotic;<br>phenicol<br>antibiotic;<br>triclosan<br>phenicol<br>antibiotic                                                       | 24 | 0 | Yes | 22 | 39 | 42 | 63 | 57 | 69 | 39 | 40 | 36 |
| 3000195 | <i>tetB(P)</i>   | tetracycline<br>antibiotic<br>lincosamide<br>antibiotic;<br>streptogramin<br>antibiotic;<br>pleuromutilin<br>antibiotic             | 23 | 0 | Yes | 25 | 27 | 31 | 30 | 48 | 55 | 40 | 24 | 28 |
| 3000300 | <i>lsaA</i>      | macrolide<br>antibiotic;<br>fluoroquinolone<br>antibiotic;<br>cephalosporin;<br>cephamycin;<br>penam;<br>tetracycline<br>antibiotic | 22 | 0 | Yes | 17 | 15 | 28 | 28 | 24 | 30 | 37 | 23 | 35 |
| 3000676 | <i>H-NS</i>      | glycopeptide<br>antibiotic                                                                                                          | 22 | 0 | Yes | 50 | 37 | 20 | 56 | 56 | 37 | 27 | 62 | 41 |
| 3003070 | <i>vanXD</i>     | tetracycline<br>antibiotic                                                                                                          | 22 | 0 | Yes | 12 | 27 | 16 | 32 | 26 | 12 | 24 | 39 | 22 |
| 3000180 | <i>tetA(P)</i>   | macrolide<br>antibiotic;<br>lincosamide<br>antibiotic;<br>streptogramin<br>antibiotic                                               | 21 | 0 | Yes | 19 | 17 | 31 | 43 | 21 | 30 | 46 | 52 | 28 |
| 3000593 | <i>ermQ</i>      | aminoglycoside<br>antibiotic                                                                                                        | 21 | 0 | Yes | 11 | 13 | 11 | 33 | 34 | 29 | 25 | 16 | 18 |
| 3002626 | <i>ant(6)-Ia</i> | glycopeptide<br>antibiotic                                                                                                          | 21 | 0 | Yes | 14 | 17 | 14 | 29 | 25 | 18 | 26 | 27 | 28 |
| 3003069 | <i>vanXYG</i>    | lincosamide<br>antibiotic;<br>pleuromutilin<br>antibiotic                                                                           | 21 | 0 | Yes | 26 | 19 | 16 | 40 | 50 | 29 | 28 | 37 | 20 |
| 3003206 | <i>lsaE</i>      | tetracycline<br>antibiotic                                                                                                          | 21 | 0 | Yes | 20 | 30 | 25 | 34 | 27 | 53 | 28 | 42 | 30 |
| 3000206 | <i>emrK</i>      | antibiotic                                                                                                                          | 20 | 0 | Yes | 29 | 29 | 24 | 39 | 25 | 22 | 35 | 34 | 32 |
| 3003551 | <i>emeA</i>      | acridine dye<br>glycopeptide<br>antibiotic                                                                                          | 20 | 0 | Yes | 22 | 28 | 26 | 31 | 16 | 29 | 34 | 39 | 44 |
| 3002923 | <i>vanRD</i>     | glycopeptide<br>antibiotic                                                                                                          | 19 | 0 | Yes | 13 | 19 | 12 | 42 | 25 | 28 | 14 | 36 | 15 |
| 3002944 | <i>vanHD</i>     | glycopeptide<br>antibiotic                                                                                                          | 19 | 0 | Yes | 0  | 18 | 37 | 37 | 30 | 17 | 32 | 26 | 23 |
| 3000005 | <i>vanD</i>      | glycopeptide<br>antibiotic                                                                                                          | 18 | 0 | Yes | 0  | 26 | 16 | 29 | 28 | 44 | 17 | 19 | 26 |

|         |                  |                                                                                                                                                                                                                                                                                                                                              |    |   |     |    |    |    |    |    |    |    |    |    |
|---------|------------------|----------------------------------------------------------------------------------------------------------------------------------------------------------------------------------------------------------------------------------------------------------------------------------------------------------------------------------------------|----|---|-----|----|----|----|----|----|----|----|----|----|
| 3000522 | <i>ermG</i>      | macrolide<br>antibiotic;<br>lincosamide<br>antibiotic;<br>streptogramin<br>antibiotic                                                                                                                                                                                                                                                        | 17 | 0 | Yes | 0  | 22 | 23 | 16 | 15 | 27 | 27 | 21 | 19 |
| 3000263 | <i>marA</i>      | fluoroquinolone<br>antibiotic;<br>monobactam;<br>carbapenem;<br>cephalosporin;<br>glycylcycline;<br>cephamycin;<br>penam;<br>tetracycline<br>antibiotic;<br>rifamycin<br>antibiotic;<br>phenicol<br>antibiotic;<br>triclosan;<br>penem<br>macrolide<br>antibiotic;<br>fluoroquinolone<br>antibiotic;<br>penam;<br>tetracycline<br>antibiotic | 14 | 0 | Yes | 14 | 17 | 10 | 28 | 16 | 20 | 20 | 22 | 0  |
| 3000832 | <i>evgA</i>      | glycopeptide<br>antibiotic                                                                                                                                                                                                                                                                                                                   | 14 | 0 | Yes | 10 | 0  | 12 | 23 | 15 | 12 | 13 | 26 | 17 |
| 3002972 | <i>vanTG</i>     | aminoglycoside<br>antibiotic                                                                                                                                                                                                                                                                                                                 | 14 | 0 | Yes | 12 | 13 | 0  | 24 | 26 | 12 | 14 | 13 | 19 |
| 3002630 | <i>ant(9)-Ia</i> | antibiotic<br>macrolide<br>antibiotic;<br>fluoroquinolone<br>antibiotic;                                                                                                                                                                                                                                                                     | 12 | 0 | Yes | 0  | 11 | 0  | 10 | 0  | 13 | 22 | 16 | 0  |
| 3000508 | <i>gadX</i>      | penam<br>lincosamide<br>antibiotic                                                                                                                                                                                                                                                                                                           | 11 | 0 | Yes | 16 | 0  | 12 | 16 | 17 | 0  | 19 | 0  | 11 |
| 3002882 | <i>lmrD</i>      | glycopeptide<br>antibiotic                                                                                                                                                                                                                                                                                                                   | 10 | 0 | Yes | 0  | 0  | 28 | 0  | 0  | 13 | 14 | 0  | 12 |
| 3002957 | <i>vanYD</i>     | fluoroquinolone<br>antibiotic;<br>lincosamide<br>antibiotic;<br>nucleoside<br>antibiotic;                                                                                                                                                                                                                                                    | 10 | 0 | Yes | 0  | 0  | 12 | 10 | 10 | 0  | 0  | 11 | 0  |
| 3001214 | <i>mdtM</i>      | acridine dye;                                                                                                                                                                                                                                                                                                                                | 7  | 0 | Yes | 10 | 0  | 0  | 15 | 0  | 16 | 11 | 16 | 0  |

| 3002909 | <i>vanG</i>      | phenicol<br>antibiotic<br>glycopeptide<br>antibiotic<br>lincosamide<br>antibiotic;<br>streptogramin<br>antibiotic;<br>pleuromutilin<br>antibiotic                                                                           | 6                         | 0                        | Yes   | 0            | 0            | 0            | 0            | 15           | 14           | 16        | 12           | 0            |
|---------|------------------|-----------------------------------------------------------------------------------------------------------------------------------------------------------------------------------------------------------------------------|---------------------------|--------------------------|-------|--------------|--------------|--------------|--------------|--------------|--------------|-----------|--------------|--------------|
| 3003112 | <i>IsaC</i>      | lincosamide<br>antibiotic                                                                                                                                                                                                   | 6                         | 0                        | Yes   | 0            | 0            | 0            | 17           | 12           | 0            | 18        | 15           | 14           |
| 3002881 | <i>lmrC</i>      | aminocoumarin<br>antibiotic                                                                                                                                                                                                 | 4                         | 0                        | Yes   | 0            | 0            | 0            | 0            | 0            | 0            | 0         | 12           | 17           |
| 3000792 | <i>mdtA</i>      | tetracycline<br>antibiotic                                                                                                                                                                                                  | 3                         | 0                        | Yes   | 0            | 0            | 0            | 0            | 0            | 19           | 0         | 0            | 0            |
| 3000186 | <i>tetM</i>      | macrolide<br>antibiotic;<br>fluoroquinolone<br>antibiotic;<br>aminoglycoside<br>antibiotic;<br>cephalosporin;<br>penam;<br>tetracycline<br>antibiotic;<br>aminocoumarin<br>antibiotic;<br>diaminopyrimid<br>ine antibiotic; | 2                         | 0                        | Yes   | 0            | 0            | 0            | 0            | 0            | 0            | 0         | 11           | 0            |
| 3000801 | <i>mexD</i>      | phenicol<br>antibiotic<br>aminoglycoside<br>antibiotic;<br>cephalosporin;<br>cephamycin;                                                                                                                                    | 2                         | 0                        | Yes   | 0            | 0            | 0            | 16           | 0            | 0            | 0         | 0            | 0            |
| 3003052 | <i>smeB</i>      | penam<br>aminoglycoside<br>antibiotic                                                                                                                                                                                       | 2                         | 0                        | Yes   | 0            | 0            | 0            | 0            | 0            | 0            | 0         | 0            | 0            |
| 3002629 | <i>ant(6)-Ib</i> | antibiotic                                                                                                                                                                                                                  | 1                         | 0                        | Yes   | 0            | 0            | 0            | 0            | 0            | 0            | 0         | 0            | 0            |
| ARO     | Name             | Class of<br>Resistance                                                                                                                                                                                                      | Present<br>in<br>Enriched | Present<br>in<br>Shotgun | Baits | Set 3<br>- 9 | Set 3 -<br>6 | Set 3 -<br>8 | Set 3 -<br>7 | Set 3 -<br>5 | Set 3 -<br>3 | Set 3 - 2 | Set 3 -<br>4 | Set 3 -<br>1 |
| 3000190 | <i>tetO</i>      | tetracycline<br>antibiotic                                                                                                                                                                                                  | 27                        | 6                        | Yes   | 4389         | 3143         | 4035         | 4083         | 3662         | 3459         | 5115      | 3742         | 4278         |
| 3000191 | <i>tetQ</i>      | tetracycline<br>antibiotic                                                                                                                                                                                                  | 27                        | 6                        | Yes   | 3196         | 25807        | 27902        | 30217        | 30537        | 31375        | 57377     | 35805        | 38948        |
| 3000196 | <i>tet32</i>     | tetracycline<br>antibiotic                                                                                                                                                                                                  | 27                        | 6                        | Yes   | 8770         | 7045         | 8207         | 8497         | 8055         | 7484         | 12627     | 9006         | 9549         |
| 3000567 | <i>tet(40)</i>   | tetracycline<br>antibiotic                                                                                                                                                                                                  | 27                        | 6                        | Yes   | 7844         | 5526         | 7038         | 6490         | 6893         | 5856         | 7884      | 5888         | 5971         |

|         |                                                                                                                                                 |                                                                          |    |   |     |      |      |      |      |      |      |      |      |      |
|---------|-------------------------------------------------------------------------------------------------------------------------------------------------|--------------------------------------------------------------------------|----|---|-----|------|------|------|------|------|------|------|------|------|
| 3002837 | <i>lmuC</i>                                                                                                                                     | lincosamide<br>antibiotic                                                | 27 | 6 | Yes | 3591 | 2944 | 3308 | 3659 | 3351 | 3360 | 6483 | 4322 | 4901 |
| 3002867 | <i>dfrF</i>                                                                                                                                     | diaminopyrimidine<br>antibiotic                                          | 27 | 6 | Yes | 1624 | 1429 | 1733 | 2133 | 1746 | 1579 | 3276 | 2464 | 2945 |
| 3002999 | <i>cbLA-1</i>                                                                                                                                   | cephalosporin<br>glycopeptide<br>antibiotic                              | 27 | 6 | Yes | 4441 | 3146 | 4007 | 4244 | 3884 | 3509 | 5435 | 3914 | 3948 |
| 3002926 | <i>vanRG</i>                                                                                                                                    | tetracycline<br>antibiotic                                               | 25 | 6 | Yes | 49   | 50   | 29   | 19   | 29   | 45   | 21   | 18   | 21   |
| 3000194 | <i>tetW</i>                                                                                                                                     | antibiotic<br>macrolide                                                  | 0  | 6 | No  | 0    | 0    | 0    | 0    | 0    | 0    | 0    | 0    | 0    |
| 3000375 | <i>ermB</i><br>Nocardia<br>rifampin<br>resistant beta-<br>subunit of<br>RNA<br>polymerase<br>( <i>rpoB2</i> )                                   | antibiotic;<br>lincosamide<br>antibiotic;<br>streptogramin<br>antibiotic | 0  | 6 | No  | 0    | 0    | 0    | 0    | 0    | 0    | 0    | 0    | 0    |
| 3000501 | <i>novA</i><br>aac(6')-Ie-<br>aph(2'')-Ia<br>Streptomyces<br>rishiriensis<br><i>parY</i> mutant<br>conferring<br>resistance to<br>aminocoumarin | peptide<br>antibiotic;<br>rifamycin<br>aminocoumarin<br>antibiotic       | 0  | 6 | No  | 0    | 0    | 0    | 0    | 0    | 0    | 0    | 0    | 0    |
| 3002522 | <i>novA</i>                                                                                                                                     | antibiotic                                                               | 0  | 6 | Yes | 0    | 0    | 0    | 0    | 0    | 0    | 0    | 0    | 0    |
| 3002597 | <i>aph(2'')-Ia</i><br>Streptomyces<br>rishiriensis<br><i>parY</i> mutant<br>conferring<br>resistance to<br>aminocoumarin                        | aminoglycoside<br>antibiotic                                             | 0  | 6 | No  | 0    | 0    | 0    | 0    | 0    | 0    | 0    | 0    | 0    |
| 3003318 | Bifidobacteria<br>intrinsic <i>ileS</i><br>conferring<br>resistance to<br>mupirocin                                                             | aminocoumarin<br>antibiotic                                              | 0  | 6 | No  | 0    | 0    | 0    | 0    | 0    | 0    | 0    | 0    | 0    |
| 3003730 | <i>Campylobacter coli</i><br>chloramphenicol<br>acetyltransferase                                                                               | mupirocin                                                                | 0  | 6 | No  | 0    | 0    | 0    | 0    | 0    | 0    | 0    | 0    | 0    |
| 3004454 | <i>vanWG</i>                                                                                                                                    | phenicol<br>antibiotic<br>glycopeptide<br>antibiotic                     | 0  | 6 | No  | 0    | 0    | 0    | 0    | 0    | 0    | 0    | 0    | 0    |
| 3002965 | <i>vanWG</i>                                                                                                                                    | antibiotic<br>macrolide                                                  | 26 | 4 | Yes | 109  | 78   | 107  | 89   | 76   | 80   | 94   | 70   | 107  |
| 3000535 | <i>macB</i>                                                                                                                                     | antibiotic<br>aminoglycoside                                             | 22 | 4 | Yes | 92   | 71   | 82   | 77   | 63   | 87   | 0    | 51   | 51   |
| 3002647 | <i>aph(3')-IIIa</i>                                                                                                                             | antibiotic                                                               | 0  | 3 | No  | 0    | 0    | 0    | 0    | 0    | 0    | 0    | 0    | 0    |

|         |                                |                                                                                                                            |    |   |     |     |     |     |     |     |     |     |     |     |
|---------|--------------------------------|----------------------------------------------------------------------------------------------------------------------------|----|---|-----|-----|-----|-----|-----|-----|-----|-----|-----|-----|
| 3000556 | <i>tet44</i>                   | tetracycline<br>antibiotic<br>macrolide<br>antibiotic;<br>fluoroquinolone<br>antibiotic;<br>tetracycline<br>antibiotic;    | 27 | 2 | Yes | 145 | 110 | 130 | 117 | 119 | 112 | 216 | 170 | 211 |
| 3003056 | <i>smeE</i>                    | phenicol<br>antibiotic<br>glycopeptide                                                                                     | 8  | 2 | Yes | 0   | 0   | 0   | 0   | 20  | 0   | 0   | 0   | 0   |
| 3002937 | <i>vanSG</i>                   | antibiotic<br>aminoglycoside                                                                                               | 0  | 2 | Yes | 0   | 0   | 0   | 0   | 0   | 0   | 0   | 0   | 0   |
| 3002983 | <i>amrB</i>                    | antibiotic                                                                                                                 | 0  | 2 | No  | 0   | 0   | 0   | 0   | 0   | 0   | 0   | 0   | 0   |
| 3003559 | <i>cepA</i> beta-<br>lactamase | cephalosporin                                                                                                              | 0  | 2 | Yes | 0   | 0   | 0   | 0   | 0   | 0   | 0   | 0   | 0   |
| 3004032 | <i>tetA(46)</i>                | tetracycline<br>antibiotic                                                                                                 | 0  | 2 | No  | 0   | 0   | 0   | 0   | 0   | 0   | 0   | 0   | 0   |
| 3004033 | <i>tetB(46)</i>                | tetracycline<br>antibiotic<br>macrolide<br>antibiotic;<br>monobactam;<br>tetracycline<br>antibiotic;                       | 0  | 2 | No  | 0   | 0   | 0   | 0   | 0   | 0   | 0   | 0   | 0   |
| 3004074 | <i>muxB</i>                    | aminocoumarin<br>antibiotic<br>macrolide<br>antibiotic;<br>fluoroquinolone<br>antibiotic;<br>aminoglycoside<br>antibiotic; | 0  | 2 | No  | 0   | 0   | 0   | 0   | 0   | 0   | 0   | 0   | 0   |
| 3004144 | <i>axyY</i>                    | cephalosporin<br>fluoroquinolone<br>antibiotic;<br>cephalosporin;<br>cephamycin;                                           | 0  | 2 | No  | 0   | 0   | 0   | 0   | 0   | 0   | 0   | 0   | 0   |
| 3000502 | <i>acrF</i>                    | penam<br>aminocoumarin                                                                                                     | 27 | 1 | Yes | 219 | 188 | 188 | 171 | 199 | 166 | 192 | 154 | 155 |
| 3000793 | <i>mdtB</i>                    | antibiotic<br>aminocoumarin                                                                                                | 0  | 1 | No  | 0   | 0   | 0   | 0   | 0   | 0   | 0   | 0   | 0   |
| 3000794 | <i>mdtC</i>                    | antibiotic                                                                                                                 | 0  | 1 | No  | 0   | 0   | 0   | 0   | 0   | 0   | 0   | 0   | 0   |
| 3003097 | <i>cfxA6</i>                   | cephamycin                                                                                                                 | 0  | 1 | Yes | 0   | 0   | 0   | 0   | 0   | 0   | 0   | 0   | 0   |
| 3000027 | <i>emrA</i>                    | fluoroquinolone<br>antibiotic<br>macrolide<br>antibiotic;<br>fluoroquinolone<br>antibiotic;                                | 27 | 0 | Yes | 72  | 67  | 70  | 80  | 80  | 53  | 87  | 55  | 94  |
| 3000237 | <i>tolC</i>                    | antibiotic;                                                                                                                | 27 | 0 | Yes | 81  | 59  | 60  | 90  | 109 | 64  | 74  | 75  | 83  |

|         |                              |                                                                                                                                                                                                                              |    |   |     |     |     |     |     |     |     |     |     |     |
|---------|------------------------------|------------------------------------------------------------------------------------------------------------------------------------------------------------------------------------------------------------------------------|----|---|-----|-----|-----|-----|-----|-----|-----|-----|-----|-----|
| 3000491 | <i>acrD</i>                  | cephalosporin;<br>glycylcycline;<br>cephamycin;<br>penam;<br>tetracycline<br>antibiotic;<br>aminocoumarin<br>antibiotic;<br>rifamycin<br>antibiotic;<br>phenicol<br>antibiotic;<br>triclosan<br>aminoglycoside<br>antibiotic | 27 | 0 | Yes | 145 | 161 | 182 | 152 | 254 | 150 | 165 | 134 | 126 |
| 3000615 | <i>mefA</i>                  | macrolide<br>antibiotic                                                                                                                                                                                                      | 27 | 0 | Yes | 79  | 57  | 73  | 56  | 54  | 56  | 70  | 84  | 58  |
| 3000616 | <i>mel</i>                   | streptogramin<br>antibiotic<br>macrolide<br>antibiotic;                                                                                                                                                                      | 27 | 0 | Yes | 90  | 61  | 75  | 98  | 63  | 63  | 165 | 119 | 114 |
| 3000795 | <i>mdtE</i>                  | fluoroquinolone<br>antibiotic;<br>penam<br>macrolide<br>antibiotic;                                                                                                                                                          | 27 | 0 | Yes | 139 | 64  | 118 | 83  | 127 | 110 | 114 | 110 | 93  |
| 3000796 | <i>mdtF</i>                  | fluoroquinolone<br>antibiotic;<br>penam<br>aminoglycoside<br>antibiotic;                                                                                                                                                     | 27 | 0 | Yes | 247 | 155 | 156 | 149 | 172 | 113 | 159 | 159 | 134 |
| 3000830 | <i>cpxA</i>                  | aminocoumarin<br>antibiotic<br>macrolide<br>antibiotic;                                                                                                                                                                      | 27 | 0 | Yes | 142 | 101 | 91  | 94  | 133 | 131 | 108 | 90  | 85  |
| 3000833 | <i>evgS</i>                  | fluoroquinolone<br>antibiotic                                                                                                                                                                                                | 27 | 0 | Yes | 36  | 47  | 47  | 59  | 64  | 28  | 66  | 68  | 61  |
| 3001216 | <i>mdtH</i>                  | fluoroquinolone<br>antibiotic<br>tetracycline<br>antibiotic;                                                                                                                                                                 | 27 | 0 | Yes | 72  | 31  | 38  | 39  | 34  | 37  | 56  | 47  | 45  |
| 3001328 | <i>Escherichia coli mdfA</i> | benzalkonium<br>chloride;<br>rhodamine                                                                                                                                                                                       | 27 | 0 | Yes | 40  | 47  | 46  | 54  | 48  | 42  | 46  | 43  | 50  |

|         |                     |                                                                                          |    |   |     |     |     |     |     |     |     |     |     |     |
|---------|---------------------|------------------------------------------------------------------------------------------|----|---|-----|-----|-----|-----|-----|-----|-----|-----|-----|-----|
| 3003549 | <i>mdtO</i>         | nucleoside<br>antibiotic;<br>acridine dye<br>nucleoside                                  | 27 | 0 | Yes | 124 | 88  | 124 | 107 | 132 | 126 | 127 | 101 | 104 |
| 3003550 | <i>mdtP</i>         | antibiotic;<br>acridine dye<br>peptide                                                   | 27 | 0 | Yes | 138 | 103 | 154 | 110 | 128 | 115 | 134 | 96  | 71  |
| 3003576 | <i>eptA</i>         | antibiotic<br>peptide                                                                    | 27 | 0 | Yes | 125 | 87  | 75  | 76  | 113 | 79  | 84  | 107 | 107 |
| 3003578 | <i>pmrF</i>         | antibiotic<br>fluoroquinolone                                                            | 27 | 0 | Yes | 96  | 64  | 67  | 75  | 81  | 47  | 87  | 56  | 48  |
| 3000074 | <i>emrB</i>         | antibiotic<br>fluoroquinolone                                                            | 26 | 0 | Yes | 37  | 53  | 44  | 76  | 55  | 63  | 65  | 47  | 62  |
| 3000499 | <i>acrE</i>         | antibiotic;<br>cephalosporin;<br>cephamycin;<br>penam<br>macrolide                       | 26 | 0 | Yes | 91  | 75  | 88  | 66  | 78  | 43  | 73  | 80  | 65  |
| 3000518 | <i>crp</i>          | antibiotic;<br>fluoroquinolone<br>antibiotic;<br>penam<br>fluoroquinolone                | 26 | 0 | Yes | 44  | 17  | 45  | 27  | 23  | 26  | 39  | 23  | 16  |
| 3000656 | <i>acrS</i>         | antibiotic;<br>cephalosporin;<br>glycylcycline;<br>cephamycin;<br>penam;<br>tetracycline | 26 | 0 | Yes | 33  | 32  | 54  | 29  | 32  | 18  | 68  | 38  | 40  |
| 3002635 | <i>aph(2'')-IIa</i> | aminoglycoside<br>antibiotic<br>nucleoside                                               | 26 | 0 | Yes | 71  | 51  | 57  | 43  | 39  | 52  | 98  | 77  | 63  |
| 3003548 | <i>mdtN</i>         | antibiotic;<br>acridine dye<br>tetracycline                                              | 26 | 0 | Yes | 26  | 36  | 39  | 23  | 37  | 34  | 34  | 22  | 33  |
| 3000254 | <i>emrY</i>         | antibiotic                                                                               | 25 | 0 | Yes | 33  | 0   | 30  | 20  | 23  | 18  | 32  | 55  | 29  |
| 3001329 | <i>mdtG</i>         | fosfomycin<br>peptide                                                                    | 25 | 0 | Yes | 31  | 44  | 32  | 45  | 45  | 38  | 40  | 15  | 27  |
| 3002986 | <i>bacA</i>         | antibiotic<br>fluoroquinolone                                                            | 25 | 0 | Yes | 42  | 49  | 29  | 41  | 36  | 15  | 20  | 28  | 33  |
| 3000216 | <i>acrB</i>         | antibiotic;<br>cephalosporin;<br>glycylcycline;<br>penam;                                | 24 | 0 | Yes | 28  | 15  | 34  | 17  | 29  | 23  | 24  | 26  | 10  |



|         |                  |                                                                                                                                     |    |   |     |    |    |    |    |    |    |    |    |    |
|---------|------------------|-------------------------------------------------------------------------------------------------------------------------------------|----|---|-----|----|----|----|----|----|----|----|----|----|
| 3002688 | <i>catS</i>      | tetracycline<br>antibiotic;<br>rifamycin<br>antibiotic;<br>phenicol<br>antibiotic;<br>triclosan<br>phenicol<br>antibiotic           | 24 | 0 | Yes | 36 | 15 | 18 | 22 | 25 | 28 | 45 | 33 | 44 |
| 3000195 | <i>tetB(P)</i>   | tetracycline<br>antibiotic<br>lincosamide<br>antibiotic;<br>streptogramin<br>antibiotic;<br>pleuromutilin<br>antibiotic             | 23 | 0 | Yes | 23 | 17 | 23 | 25 | 29 | 30 | 16 | 20 | 39 |
| 3000300 | <i>lsaA</i>      | macrolide<br>antibiotic;<br>fluoroquinolone<br>antibiotic;<br>cephalosporin;<br>cephamycin;<br>penam;<br>tetracycline<br>antibiotic | 22 | 0 | Yes | 0  | 0  | 18 | 11 | 18 | 10 | 17 | 15 | 25 |
| 3000676 | <i>H-NS</i>      | glycopeptide<br>antibiotic                                                                                                          | 22 | 0 | Yes | 41 | 31 | 19 | 17 | 30 | 37 | 35 | 30 | 27 |
| 3003070 | <i>vanXD</i>     | tetracycline<br>antibiotic                                                                                                          | 22 | 0 | Yes | 16 | 13 | 12 | 11 | 18 | 19 | 54 | 21 | 25 |
| 3000180 | <i>tetA(P)</i>   | macrolide<br>antibiotic;<br>lincosamide<br>antibiotic;<br>streptogramin<br>antibiotic                                               | 21 | 0 | Yes | 25 | 14 | 28 | 31 | 33 | 0  | 36 | 45 | 48 |
| 3000593 | <i>ermQ</i>      | aminoglycoside<br>antibiotic                                                                                                        | 21 | 0 | Yes | 0  | 15 | 15 | 21 | 10 | 13 | 28 | 15 | 26 |
| 3002626 | <i>ant(6)-Ia</i> | glycopeptide<br>antibiotic                                                                                                          | 21 | 0 | Yes | 19 | 26 | 14 | 15 | 13 | 15 | 23 | 19 | 12 |
| 3003069 | <i>vanXYG</i>    | lincosamide<br>antibiotic;<br>pleuromutilin<br>antibiotic                                                                           | 21 | 0 | Yes | 23 | 15 | 25 | 10 | 24 | 20 | 11 | 13 | 20 |
| 3003206 | <i>lsaE</i>      | tetracycline<br>antibiotic                                                                                                          | 21 | 0 | Yes | 0  | 21 | 13 | 29 | 26 | 16 | 46 | 17 | 22 |
| 3000206 | <i>emrK</i>      | acridine dye<br>glycopeptide<br>antibiotic                                                                                          | 20 | 0 | Yes | 15 | 13 | 10 | 0  | 15 | 16 | 12 | 20 | 25 |
| 3003551 | <i>emeA</i>      | antibiotic                                                                                                                          | 20 | 0 | Yes | 16 | 29 | 32 | 22 | 0  | 13 | 20 | 20 | 35 |
| 3002923 | <i>vanRD</i>     | antibiotic                                                                                                                          | 19 | 0 | Yes | 20 | 16 | 0  | 11 | 14 | 13 | 18 | 11 | 23 |

|         |                  |                                                                                                                                                                                                                                                |    |   |     |    |    |    |    |    |    |    |    |    |
|---------|------------------|------------------------------------------------------------------------------------------------------------------------------------------------------------------------------------------------------------------------------------------------|----|---|-----|----|----|----|----|----|----|----|----|----|
| 3002944 | <i>vanHD</i>     | glycopeptide<br>antibiotic                                                                                                                                                                                                                     | 19 | 0 | Yes | 15 | 22 | 0  | 37 | 14 | 19 | 32 | 11 | 32 |
| 3000005 | <i>vanD</i>      | glycopeptide<br>antibiotic<br>macrolide<br>antibiotic;<br>lincosamide<br>antibiotic;                                                                                                                                                           | 18 | 0 | Yes | 14 | 0  | 19 | 20 | 19 | 0  | 15 | 13 | 14 |
| 3000522 | <i>ermG</i>      | streptogramin<br>antibiotic<br>fluoroquinolone<br>antibiotic;<br>monobactam;<br>carbapenem;<br>cephalosporin;<br>glycylcycline;<br>cephamycin;<br>penam;<br>tetracycline<br>antibiotic;<br>rifamycin<br>antibiotic;<br>phenicol<br>antibiotic; | 17 | 0 | Yes | 0  | 0  | 18 | 0  | 0  | 13 | 31 | 10 | 0  |
| 3000263 | <i>marA</i>      | triclosan;<br>penem<br>macrolide<br>antibiotic;<br>fluoroquinolone<br>antibiotic;<br>penam;<br>tetracycline<br>antibiotic;                                                                                                                     | 14 | 0 | Yes | 17 | 0  | 0  | 0  | 0  | 0  | 14 | 12 | 12 |
| 3000832 | <i>evgA</i>      | antibiotic<br>glycopeptide                                                                                                                                                                                                                     | 14 | 0 | Yes | 0  | 11 | 0  | 12 | 0  | 13 | 23 | 0  | 16 |
| 3002972 | <i>vanTG</i>     | antibiotic<br>aminoglycoside                                                                                                                                                                                                                   | 14 | 0 | Yes | 0  | 0  | 12 | 0  | 0  | 12 | 0  | 20 | 11 |
| 3002630 | <i>ant(9)-Ia</i> | antibiotic<br>macrolide<br>antibiotic;<br>fluoroquinolone<br>antibiotic;                                                                                                                                                                       | 12 | 0 | Yes | 0  | 11 | 16 | 0  | 11 | 0  | 34 | 26 | 11 |
| 3000508 | <i>gadX</i>      | penam<br>lincosamide                                                                                                                                                                                                                           | 11 | 0 | Yes | 0  | 0  | 0  | 13 | 13 | 0  | 15 | 12 | 0  |
| 3002882 | <i>lmrD</i>      | antibiotic<br>glycopeptide                                                                                                                                                                                                                     | 10 | 0 | Yes | 19 | 0  | 0  | 0  | 0  | 10 | 18 | 14 | 12 |
| 3002957 | <i>vanYD</i>     | antibiotic<br>fluoroquinolone<br>antibiotic;<br>lincosamide                                                                                                                                                                                    | 10 | 0 | Yes | 0  | 19 | 0  | 0  | 12 | 0  | 12 | 0  | 13 |
| 3001214 | <i>mdtM</i>      | antibiotic;                                                                                                                                                                                                                                    | 7  | 0 | Yes | 0  | 0  | 10 | 0  | 10 | 0  | 0  | 0  | 0  |

|         |                  |                                                                                                                                                                                                          |   |   |     |    |    |    |    |    |    |    |    |   |
|---------|------------------|----------------------------------------------------------------------------------------------------------------------------------------------------------------------------------------------------------|---|---|-----|----|----|----|----|----|----|----|----|---|
| 3002909 | <i>vanG</i>      | nucleoside antibiotic;<br>acridine dye;<br>phenicol antibiotic<br>glycopeptide antibiotic<br>lincosamide antibiotic;<br>streptogramin antibiotic;                                                        | 6 | 0 | Yes | 12 | 0  | 0  | 0  | 0  | 0  | 14 | 0  | 0 |
| 3003112 | <i>lsaC</i>      | pleuromutilin antibiotic<br>lincosamide antibiotic                                                                                                                                                       | 6 | 0 | Yes | 0  | 0  | 12 | 0  | 0  | 0  | 0  | 0  | 0 |
| 3002881 | <i>lmrC</i>      | aminocoumarin antibiotic                                                                                                                                                                                 | 4 | 0 | Yes | 11 | 0  | 0  | 14 | 0  | 0  | 0  | 0  | 0 |
| 3000792 | <i>mdtA</i>      | tetracycline antibiotic                                                                                                                                                                                  | 3 | 0 | Yes | 0  | 0  | 0  | 0  | 0  | 0  | 0  | 10 | 0 |
| 3000186 | <i>tetM</i>      | macrolide antibiotic;<br>fluoroquinolone antibiotic;<br>aminoglycoside antibiotic;<br>cephalosporin;<br>penam;<br>tetracycline antibiotic;<br>aminocoumarin antibiotic;<br>diaminopyrimidine antibiotic; | 2 | 0 | Yes | 0  | 0  | 0  | 0  | 0  | 0  | 0  | 13 | 0 |
| 3000801 | <i>mexD</i>      | phenicol antibiotic<br>aminoglycoside antibiotic;<br>cephalosporin;<br>cephamycin;                                                                                                                       | 2 | 0 | Yes | 0  | 0  | 0  | 0  | 17 | 0  | 0  | 0  | 0 |
| 3003052 | <i>smeB</i>      | penam<br>aminoglycoside antibiotic                                                                                                                                                                       | 2 | 0 | Yes | 0  | 32 | 0  | 0  | 0  | 38 | 0  | 0  | 0 |
| 3002629 | <i>ant(6)-Ib</i> | antibiotic                                                                                                                                                                                               | 1 | 0 | Yes | 0  | 0  | 0  | 0  | 0  | 0  | 10 | 0  | 0 |

| ARO     | Name         | Class of Resistance     | Present in Enriched | Present in Shotgun | Baits | Set 1 - 6 Shotgun | Set 1 - 7 Shotgun | Set 2 - 9 Shotgun | Set 2 - 5 Shotgun | Set 3 - 5 Shotgun | Set 3 - 1 Shotgun |
|---------|--------------|-------------------------|---------------------|--------------------|-------|-------------------|-------------------|-------------------|-------------------|-------------------|-------------------|
| 3000190 | <i>tetO</i>  | tetracycline antibiotic | 27                  | 6                  | Yes   | 127               | 146               | 296               | 281               | 179               | 211               |
| 3000191 | <i>tetQ</i>  | tetracycline antibiotic | 27                  | 6                  | Yes   | 654               | 774               | 1568              | 1314              | 790               | 1150              |
| 3000196 | <i>tet32</i> | tetracycline antibiotic | 27                  | 6                  | Yes   | 116               | 151               | 238               | 221               | 133               | 227               |

|         |                                                                                                              |                                                                              |    |   |     |     |     |      |     |     |     |
|---------|--------------------------------------------------------------------------------------------------------------|------------------------------------------------------------------------------|----|---|-----|-----|-----|------|-----|-----|-----|
| 3000567 | <i>tet(40)</i>                                                                                               | tetracycline antibiotic                                                      | 27 | 6 | Yes | 44  | 59  | 96   | 90  | 66  | 72  |
| 3002837 | <i>lnuC</i>                                                                                                  | lincosamide antibiotic<br>diaminopyrimidine<br>antibiotic                    | 27 | 6 | Yes | 94  | 114 | 208  | 174 | 84  | 152 |
| 3002867 | <i>dfrF</i>                                                                                                  |                                                                              | 27 | 6 | Yes | 32  | 32  | 86   | 50  | 38  | 48  |
| 3002999 | <i>cbLA-1</i>                                                                                                | cephalosporin                                                                | 27 | 6 | Yes | 46  | 50  | 60   | 66  | 44  | 76  |
| 3002926 | <i>vanRG</i>                                                                                                 | glycopeptide antibiotic                                                      | 25 | 6 | Yes | 10  | 22  | 30   | 28  | 16  | 24  |
| 3000194 | <i>tetW</i>                                                                                                  | tetracycline antibiotic                                                      | 0  | 6 | No  | 546 | 635 | 1108 | 836 | 649 | 862 |
| 3000375 | <i>ermB</i><br>Nocardia<br>rifampin<br>resistant<br>beta-subunit<br>of RNA<br>polymerase<br>( <i>rpoB2</i> ) | macrolide antibiotic;<br>lincosamide antibiotic;<br>streptogramin antibiotic | 0  | 6 | No  | 36  | 34  | 74   | 70  | 34  | 46  |
| 3000501 | <i>novA</i>                                                                                                  | peptide antibiotic;<br>rifamycin antibiotic<br>aminocoumarin<br>antibiotic   | 0  | 6 | No  | 86  | 120 | 136  | 94  | 96  | 108 |
| 3002522 | <i>aac(6')-Ie-aph(2'')-Ia</i>                                                                                | aminoglycoside<br>antibiotic                                                 | 0  | 6 | Yes | 12  | 14  | 14   | 24  | 22  | 16  |
| 3002597 | Streptomyces<br>rishiriensis<br><i>parY</i> mutant<br>conferring<br>resistance to<br>aminocouma<br>rin       | aminoglycoside<br>antibiotic                                                 | 0  | 6 | No  | 30  | 44  | 80   | 78  | 46  | 56  |
| 3003318 | Bifidobacter<br>ia intrinsic<br><i>ileS</i><br>conferring<br>resistance to<br>mupirocin                      | aminocoumarin<br>antibiotic                                                  | 0  | 6 | No  | 96  | 108 | 178  | 148 | 110 | 124 |
| 3003730 | <i>Campylobac<br/>ter coli</i><br>chloramphen<br>icol<br>acetyltransfe<br>rase                               | mupirocin                                                                    | 0  | 6 | No  | 50  | 74  | 98   | 68  | 60  | 82  |
| 3004454 |                                                                                                              | phenicol antibiotic                                                          | 0  | 6 | No  | 14  | 16  | 22   | 26  | 10  | 22  |
| 3002965 | <i>vanWG</i>                                                                                                 | glycopeptide antibiotic                                                      | 26 | 4 | Yes | 14  | 0   | 28   | 24  | 14  | 0   |
| 3000535 | <i>macB</i>                                                                                                  | macrolide antibiotic<br>aminoglycoside<br>antibiotic                         | 22 | 4 | Yes | 0   | 12  | 16   | 28  | 0   | 18  |
| 3002647 | <i>aph(3')-IIIa</i>                                                                                          |                                                                              | 0  | 3 | No  | 0   | 12  | 0    | 10  | 0   | 10  |
| 3000556 | <i>tet44</i>                                                                                                 | tetracycline antibiotic                                                      | 27 | 2 | Yes | 0   | 0   | 10   | 12  | 0   | 0   |

|         |                                |                                                                                                            |    |   |     |    |    |    |    |    |    |
|---------|--------------------------------|------------------------------------------------------------------------------------------------------------|----|---|-----|----|----|----|----|----|----|
| 3003056 | <i>smeE</i>                    | macrolide antibiotic;<br>fluoroquinolone<br>antibiotic; tetracycline<br>antibiotic; phenicol<br>antibiotic | 8  | 2 | Yes | 0  | 12 | 12 | 0  | 0  | 0  |
| 3002937 | <i>vanSG</i>                   | glycopeptide antibiotic<br>aminoglycoside                                                                  | 0  | 2 | Yes | 0  | 10 | 16 | 0  | 0  | 0  |
| 3002983 | <i>amrB</i>                    | antibiotic                                                                                                 | 0  | 2 | No  | 0  | 0  | 0  | 0  | 10 | 10 |
| 3003559 | <i>cepA</i> beta-<br>lactamase | cephalosporin                                                                                              | 0  | 2 | Yes | 0  | 0  | 12 | 0  | 10 | 0  |
| 3004032 | <i>tetA(46)</i>                | tetracycline antibiotic                                                                                    | 0  | 2 | No  | 0  | 0  | 10 | 0  | 0  | 16 |
| 3004033 | <i>tetB(46)</i>                | tetracycline antibiotic                                                                                    | 0  | 2 | No  | 0  | 0  | 14 | 10 | 0  | 0  |
| 3004074 | <i>muxB</i>                    | macrolide antibiotic;<br>monobactam;<br>tetracycline antibiotic;<br>aminocoumarin<br>antibiotic            | 0  | 2 | No  | 0  | 0  | 0  | 15 | 0  | 18 |
| 3004144 | <i>axyY</i>                    | macrolide antibiotic;<br>fluoroquinolone<br>antibiotic;<br>aminoglycoside<br>antibiotic; cephalosporin     | 0  | 2 | No  | 16 | 0  | 26 | 0  | 0  | 0  |
| 3000502 | <i>acrF</i>                    | fluoroquinolone<br>antibiotic; cephalosporin;<br>cephamycin; penam<br>aminocoumarin                        | 27 | 1 | Yes | 0  | 0  | 13 | 0  | 0  | 0  |
| 3000793 | <i>mdtB</i>                    | antibiotic<br>aminocoumarin                                                                                | 0  | 1 | No  | 0  | 0  | 0  | 15 | 0  | 0  |
| 3000794 | <i>mdtC</i>                    | antibiotic                                                                                                 | 0  | 1 | No  | 0  | 0  | 10 | 0  | 0  | 0  |
| 3003097 | <i>cfxA6</i>                   | cephamycin<br>fluoroquinolone                                                                              | 0  | 1 | Yes | 0  | 0  | 0  | 0  | 0  | 43 |
| 3000027 | <i>emrA</i>                    | antibiotic                                                                                                 | 27 | 0 | Yes | 0  | 0  | 0  | 0  | 0  | 0  |

|         |                              |                                                                                                                                                                                                                                                         |    |   |     |   |   |   |   |   |   |
|---------|------------------------------|---------------------------------------------------------------------------------------------------------------------------------------------------------------------------------------------------------------------------------------------------------|----|---|-----|---|---|---|---|---|---|
| 3000237 | <i>tolC</i>                  | macrolide antibiotic;<br>fluoroquinolone<br>antibiotic; cephalosporin;<br>glycylcycline;<br>cephamycin; penam;<br>tetracycline antibiotic;<br>aminocoumarin<br>antibiotic; rifamycin<br>antibiotic; phenicol<br>antibiotic; triclosan<br>aminoglycoside | 27 | 0 | Yes | 0 | 0 | 0 | 0 | 0 | 0 |
| 3000491 | <i>acrD</i>                  | antibiotic                                                                                                                                                                                                                                              | 27 | 0 | Yes | 0 | 0 | 0 | 0 | 0 | 0 |
| 3000615 | <i>mefA</i>                  | macrolide antibiotic                                                                                                                                                                                                                                    | 27 | 0 | Yes | 0 | 0 | 0 | 0 | 0 | 0 |
| 3000616 | <i>mel</i>                   | macrolide antibiotic;<br>streptogramin antibiotic                                                                                                                                                                                                       | 27 | 0 | Yes | 0 | 0 | 0 | 0 | 0 | 0 |
| 3000795 | <i>mdtE</i>                  | macrolide antibiotic;<br>fluoroquinolone<br>antibiotic; penam                                                                                                                                                                                           | 27 | 0 | Yes | 0 | 0 | 0 | 0 | 0 | 0 |
| 3000796 | <i>mdtF</i>                  | macrolide antibiotic;<br>fluoroquinolone<br>antibiotic; penam<br>aminoglycoside<br>antibiotic;                                                                                                                                                          | 27 | 0 | Yes | 0 | 0 | 0 | 0 | 0 | 0 |
| 3000830 | <i>cpxA</i>                  | aminocoumarin<br>antibiotic                                                                                                                                                                                                                             | 27 | 0 | Yes | 0 | 0 | 0 | 0 | 0 | 0 |
| 3000833 | <i>evgS</i>                  | macrolide antibiotic;<br>fluoroquinolone<br>antibiotic; penam;<br>tetracycline antibiotic                                                                                                                                                               | 27 | 0 | Yes | 0 | 0 | 0 | 0 | 0 | 0 |
| 3001216 | <i>mdtH</i>                  | fluoroquinolone<br>antibiotic                                                                                                                                                                                                                           | 27 | 0 | Yes | 0 | 0 | 0 | 0 | 0 | 0 |
| 3001328 | <i>Escherichia coli mdfA</i> | tetracycline antibiotic;<br>benzalkonium chloride;<br>rhodamine                                                                                                                                                                                         | 27 | 0 | Yes | 0 | 0 | 0 | 0 | 0 | 0 |
| 3003549 | <i>mdtO</i>                  | nucleoside antibiotic;<br>acridine dye                                                                                                                                                                                                                  | 27 | 0 | Yes | 0 | 0 | 0 | 0 | 0 | 0 |
| 3003550 | <i>mdtP</i>                  | nucleoside antibiotic;<br>acridine dye                                                                                                                                                                                                                  | 27 | 0 | Yes | 0 | 0 | 0 | 0 | 0 | 0 |
| 3003576 | <i>eptA</i>                  | peptide antibiotic                                                                                                                                                                                                                                      | 27 | 0 | Yes | 0 | 0 | 0 | 0 | 0 | 0 |

|         |                     |                                                                                                                                                                                                   |    |   |     |   |   |   |   |   |   |
|---------|---------------------|---------------------------------------------------------------------------------------------------------------------------------------------------------------------------------------------------|----|---|-----|---|---|---|---|---|---|
| 3003578 | <i>pmrF</i>         | peptide antibiotic<br>fluoroquinolone                                                                                                                                                             | 27 | 0 | Yes | 0 | 0 | 0 | 0 | 0 | 0 |
| 3000074 | <i>emrB</i>         | antibiotic                                                                                                                                                                                        | 26 | 0 | Yes | 0 | 0 | 0 | 0 | 0 | 0 |
| 3000499 | <i>acrE</i>         | fluoroquinolone<br>antibiotic; cephalosporin;<br>cephamycin; penam                                                                                                                                | 26 | 0 | Yes | 0 | 0 | 0 | 0 | 0 | 0 |
| 3000518 | <i>crp</i>          | macrolide antibiotic;<br>fluoroquinolone<br>antibiotic; penam                                                                                                                                     | 26 | 0 | Yes | 0 | 0 | 0 | 0 | 0 | 0 |
| 3000656 | <i>acrS</i>         | fluoroquinolone<br>antibiotic; cephalosporin;<br>glycylcycline;<br>cephamycin; penam;<br>tetracycline antibiotic;<br>rifamycin antibiotic;<br>phenicol antibiotic;<br>triclosan<br>aminoglycoside | 26 | 0 | Yes | 0 | 0 | 0 | 0 | 0 | 0 |
| 3002635 | <i>aph(2'')-IIa</i> | antibiotic                                                                                                                                                                                        | 26 | 0 | Yes | 0 | 0 | 0 | 0 | 0 | 0 |
| 3003548 | <i>mdtN</i>         | nucleoside antibiotic;<br>acridine dye                                                                                                                                                            | 26 | 0 | Yes | 0 | 0 | 0 | 0 | 0 | 0 |
| 3000254 | <i>emrY</i>         | tetracycline antibiotic                                                                                                                                                                           | 25 | 0 | Yes | 0 | 0 | 0 | 0 | 0 | 0 |
| 3001329 | <i>mdtG</i>         | fosfomycin                                                                                                                                                                                        | 25 | 0 | Yes | 0 | 0 | 0 | 0 | 0 | 0 |
| 3002986 | <i>bacA</i>         | peptide antibiotic                                                                                                                                                                                | 25 | 0 | Yes | 0 | 0 | 0 | 0 | 0 | 0 |
| 3000216 | <i>acrB</i>         | fluoroquinolone<br>antibiotic; cephalosporin;<br>glycylcycline; penam;<br>tetracycline antibiotic;<br>rifamycin antibiotic;<br>phenicol antibiotic;<br>triclosan                                  | 24 | 0 | Yes | 0 | 0 | 0 | 0 | 0 | 0 |
| 3002688 | <i>catS</i>         | phenicol antibiotic                                                                                                                                                                               | 24 | 0 | Yes | 0 | 0 | 0 | 0 | 0 | 0 |
| 3000195 | <i>tetB(P)</i>      | tetracycline antibiotic                                                                                                                                                                           | 23 | 0 | Yes | 0 | 0 | 0 | 0 | 0 | 0 |
| 3000300 | <i>lsaA</i>         | lincosamide antibiotic;<br>streptogramin antibiotic;<br>pleuromutilin antibiotic                                                                                                                  | 22 | 0 | Yes | 0 | 0 | 0 | 0 | 0 | 0 |

|         |                  |                                                                                                                                                                                                                      |    |   |     |   |   |   |   |   |   |
|---------|------------------|----------------------------------------------------------------------------------------------------------------------------------------------------------------------------------------------------------------------|----|---|-----|---|---|---|---|---|---|
| 3000676 | <i>H-NS</i>      | macrolide antibiotic;<br>fluoroquinolone<br>antibiotic; cephalosporin;<br>cephamycin; penam;<br>tetracycline antibiotic                                                                                              | 22 | 0 | Yes | 0 | 0 | 0 | 0 | 0 | 0 |
| 3003070 | <i>vanXD</i>     | glycopeptide antibiotic                                                                                                                                                                                              | 22 | 0 | Yes | 0 | 0 | 0 | 0 | 0 | 0 |
| 3000180 | <i>tetA(P)</i>   | tetracycline antibiotic                                                                                                                                                                                              | 21 | 0 | Yes | 0 | 0 | 0 | 0 | 0 | 0 |
| 3000593 | <i>ermQ</i>      | macrolide antibiotic;<br>lincosamide antibiotic;<br>streptogramin antibiotic<br>aminoglycoside                                                                                                                       | 21 | 0 | Yes | 0 | 0 | 0 | 0 | 0 | 0 |
| 3002626 | <i>ant(6)-Ia</i> | antibiotic                                                                                                                                                                                                           | 21 | 0 | Yes | 0 | 0 | 0 | 0 | 0 | 0 |
| 3003069 | <i>vanXYG</i>    | glycopeptide antibiotic                                                                                                                                                                                              | 21 | 0 | Yes | 0 | 0 | 0 | 0 | 0 | 0 |
| 3003206 | <i>lsaE</i>      | lincosamide antibiotic;<br>pleuromutilin antibiotic                                                                                                                                                                  | 21 | 0 | Yes | 0 | 0 | 0 | 0 | 0 | 0 |
| 3000206 | <i>emrK</i>      | tetracycline antibiotic                                                                                                                                                                                              | 20 | 0 | Yes | 0 | 0 | 0 | 0 | 0 | 0 |
| 3003551 | <i>emeA</i>      | acridine dye                                                                                                                                                                                                         | 20 | 0 | Yes | 0 | 0 | 0 | 0 | 0 | 0 |
| 3002923 | <i>vanRD</i>     | glycopeptide antibiotic                                                                                                                                                                                              | 19 | 0 | Yes | 0 | 0 | 0 | 0 | 0 | 0 |
| 3002944 | <i>vanHD</i>     | glycopeptide antibiotic                                                                                                                                                                                              | 19 | 0 | Yes | 0 | 0 | 0 | 0 | 0 | 0 |
| 3000005 | <i>vanD</i>      | glycopeptide antibiotic                                                                                                                                                                                              | 18 | 0 | Yes | 0 | 0 | 0 | 0 | 0 | 0 |
| 3000522 | <i>ermG</i>      | macrolide antibiotic;<br>lincosamide antibiotic;<br>streptogramin antibiotic                                                                                                                                         | 17 | 0 | Yes | 0 | 0 | 0 | 0 | 0 | 0 |
| 3000263 | <i>marA</i>      | fluoroquinolone<br>antibiotic; monobactam;<br>carbapenem;<br>cephalosporin;<br>glycylcycline;<br>cephamycin; penam;<br>tetracycline antibiotic;<br>rifamycin antibiotic;<br>phenicol antibiotic;<br>triclosan; penem | 14 | 0 | Yes | 0 | 0 | 0 | 0 | 0 | 0 |
| 3000832 | <i>evgA</i>      | macrolide antibiotic;<br>fluoroquinolone<br>antibiotic; penam;<br>tetracycline antibiotic                                                                                                                            | 14 | 0 | Yes | 0 | 0 | 0 | 0 | 0 | 0 |
| 3002972 | <i>vanTG</i>     | glycopeptide antibiotic                                                                                                                                                                                              | 14 | 0 | Yes | 0 | 0 | 0 | 0 | 0 | 0 |



|         |                  |                                                                                                                                                                                                         |    |   |     |   |   |   |   |   |   |
|---------|------------------|---------------------------------------------------------------------------------------------------------------------------------------------------------------------------------------------------------|----|---|-----|---|---|---|---|---|---|
| 3002630 | <i>ant(9)-Ia</i> | aminoglycoside antibiotic                                                                                                                                                                               | 12 | 0 | Yes | 0 | 0 | 0 | 0 | 0 | 0 |
| 3000508 | <i>gadX</i>      | macrolide antibiotic; fluoroquinolone antibiotic; penam                                                                                                                                                 | 11 | 0 | Yes | 0 | 0 | 0 | 0 | 0 | 0 |
| 3002882 | <i>lmrD</i>      | lincosamide antibiotic                                                                                                                                                                                  | 10 | 0 | Yes | 0 | 0 | 0 | 0 | 0 | 0 |
| 3002957 | <i>vanYD</i>     | glycopeptide antibiotic                                                                                                                                                                                 | 10 | 0 | Yes | 0 | 0 | 0 | 0 | 0 | 0 |
| 3001214 | <i>mdtM</i>      | fluoroquinolone antibiotic; lincosamide antibiotic; nucleoside antibiotic; acridine dye; phenicol antibiotic                                                                                            | 7  | 0 | Yes | 0 | 0 | 0 | 0 | 0 | 0 |
| 3002909 | <i>vanG</i>      | glycopeptide antibiotic                                                                                                                                                                                 | 6  | 0 | Yes | 0 | 0 | 0 | 0 | 0 | 0 |
| 3003112 | <i>lsaC</i>      | lincosamide antibiotic; streptogramin antibiotic; pleuromutilin antibiotic                                                                                                                              | 6  | 0 | Yes | 0 | 0 | 0 | 0 | 0 | 0 |
| 3002881 | <i>lmrC</i>      | lincosamide antibiotic aminocoumarin                                                                                                                                                                    | 4  | 0 | Yes | 0 | 0 | 0 | 0 | 0 | 0 |
| 3000792 | <i>mdtA</i>      | antibiotic                                                                                                                                                                                              | 3  | 0 | Yes | 0 | 0 | 0 | 0 | 0 | 0 |
| 3000186 | <i>tetM</i>      | tetracycline antibiotic                                                                                                                                                                                 | 2  | 0 | Yes | 0 | 0 | 0 | 0 | 0 | 0 |
| 3000801 | <i>mexD</i>      | macrolide antibiotic; fluoroquinolone antibiotic; aminoglycoside antibiotic; cephalosporin; penam; tetracycline antibiotic; aminocoumarin antibiotic; diaminopyrimidine antibiotic; phenicol antibiotic | 2  | 0 | Yes | 0 | 0 | 0 | 0 | 0 | 0 |
| 3003052 | <i>smeB</i>      | aminoglycoside antibiotic; cephalosporin; cephamycin; penam                                                                                                                                             | 2  | 0 | Yes | 0 | 0 | 0 | 0 | 0 | 0 |
| 3002629 | <i>ant(6)-Ib</i> | aminoglycoside antibiotic                                                                                                                                                                               | 1  | 0 | Yes | 0 | 0 | 0 | 0 | 0 | 0 |

## References

1. Meyer M, Kircher M. 2010. Illumina Sequencing Library Preparation for Highly Multiplexed Target Capture and Sequencing. Cold Spring Harb Protoc 2010;pdb.prot5448-pdb.prot5448.
